# Supplementary material for: Effects of silylene ligands on the performance of carbonyl hydrosilylation catalyzed by cobalt phosphine complexes
Source: Royal Society of Chemistry journal article supplement (doi:10.1039/d3dt00372h), 2023-01-01
Supplement: d3dt00372h1.pdf [file d3dt00372h1.pdf]

## Supporting Information

### Effects of silylene ligands on performance of carbonyl hydrosilylation catalyzed by cobalt phosphine complexes

Qingqing Fan,<sup>a,#</sup> Xinyu Du,<sup>a,#</sup> Wenjing Yang,<sup>a</sup> Qingshuang Li,<sup>a</sup> Wei Huang,<sup>a</sup> Hongjian Sun,<sup>a</sup> Alexander Hinz,<sup>b,\*</sup> and Xiaoyan Li<sup>a,\*</sup>

<sup>a</sup> School of Chemistry and Chemical Engineering, Key Laboratory of Special Functional Aggregated Materials, Ministry of Education, Shandong University, Shanda Nanlu 27, 250100 Jinan, People's Republic of China

<sup>b</sup> Karlsruhe Institut für Technology (KIT), Institute for Inorganic Chemistry (AOC), Engesserstr. 15, 76131 Karlsruhe, Germany

#### Corresponding Authors

\*alexander.hinz@kit.edu

\*xli63@sdu.edu.cn

#### Table of Contents

|                                                                                                                           |     |
|---------------------------------------------------------------------------------------------------------------------------|-----|
| 1. Crystallographic data for complexes <b>3</b> - <b>4</b>                                                                | S2  |
| 2. IR, <sup>1</sup> H, <sup>31</sup> P, <sup>13</sup> C and <sup>29</sup> Si NMR spectra of complexes <b>3</b> - <b>4</b> | S3  |
| 3. <sup>1</sup> H and <sup>13</sup> C NMR spectra for the alcohol products                                                | S10 |
| 4. Computational Details                                                                                                  | S36 |
| 5. The mechanism study for hydrosilylation of benzaldehyde catalyzed by complex <b>2</b>                                  | S38 |
| 6. References                                                                                                             | S39 |

## 1. Crystallographic Details

**Table S1.** Crystallographic data for complexes **3** – **4**

|                                                                          | <b>3</b>                                              | <b>4</b>                                                                          |
|--------------------------------------------------------------------------|-------------------------------------------------------|-----------------------------------------------------------------------------------|
| formula                                                                  | C <sub>15</sub> H <sub>35</sub> ClCoP <sub>3</sub> Si | C <sub>39</sub> H <sub>63</sub> Cl <sub>3</sub> CoN <sub>4</sub> PSi <sub>3</sub> |
| <i>M</i> <sub>z</sub>                                                    | 430.81                                                | 868.45                                                                            |
| crystal system                                                           | Monoclinic                                            | Monoclinic                                                                        |
| space group                                                              | I2/c                                                  | P2 <sub>1</sub> /n                                                                |
| <i>a</i> /Å                                                              | 27.1266(7)                                            | 15.27681(17)                                                                      |
| <i>b</i> /Å                                                              | 12.8624(3)                                            | 19.2189(3)                                                                        |
| <i>c</i> /Å                                                              | 12.9099(3)                                            | 15.42856(19)                                                                      |
| $\alpha$ /°                                                              | 90                                                    | 90                                                                                |
| $\beta$ /°                                                               | 92.062(2)                                             | 95.7072(11)                                                                       |
| $\gamma$ /°                                                              | 90                                                    | 90                                                                                |
| <i>V</i> [Å <sup>3</sup> ]                                               | 4501.52(19)                                           | 4507.43(10)                                                                       |
| <i>T</i> [K]                                                             | 173(2)                                                | 173(2)                                                                            |
| <i>Z</i>                                                                 | 8                                                     | 4                                                                                 |
| $\mu$ [mm <sup>-1</sup> ]                                                | 9.529                                                 | 5.959                                                                             |
| total reflns                                                             | 13144                                                 | 28041                                                                             |
| unique reflns                                                            | 3996                                                  | 8920                                                                              |
| <i>R</i> <sub>int</sub>                                                  | 0.0485                                                | 0.0511                                                                            |
| <i>R</i> <sub>1</sub> [ <i>I</i> >2 $\sigma$ ( <i>I</i> )]               | 0.0548                                                | 0.0450                                                                            |
| w <i>R</i> ( <i>F</i> <sup>2</sup> )[ <i>I</i> >2 $\sigma$ ( <i>I</i> )] | 0.1410                                                | 0.1079                                                                            |
| <i>R</i> <sub>1</sub> (all data)                                         | 0.0623                                                | 0.0548                                                                            |
| w <i>R</i> ( <i>F</i> <sup>2</sup> )(all data)                           | 0.1470                                                | 0.1120                                                                            |
| GOF on <i>F</i> <sup>2</sup>                                             | 0.859                                                 | 1.061                                                                             |

## 2. IR, $^1\text{H}$ , $^{31}\text{P}$ , $^{13}\text{C}$ and $^{29}\text{Si}$ NMR spectra of complexes 3 - 4

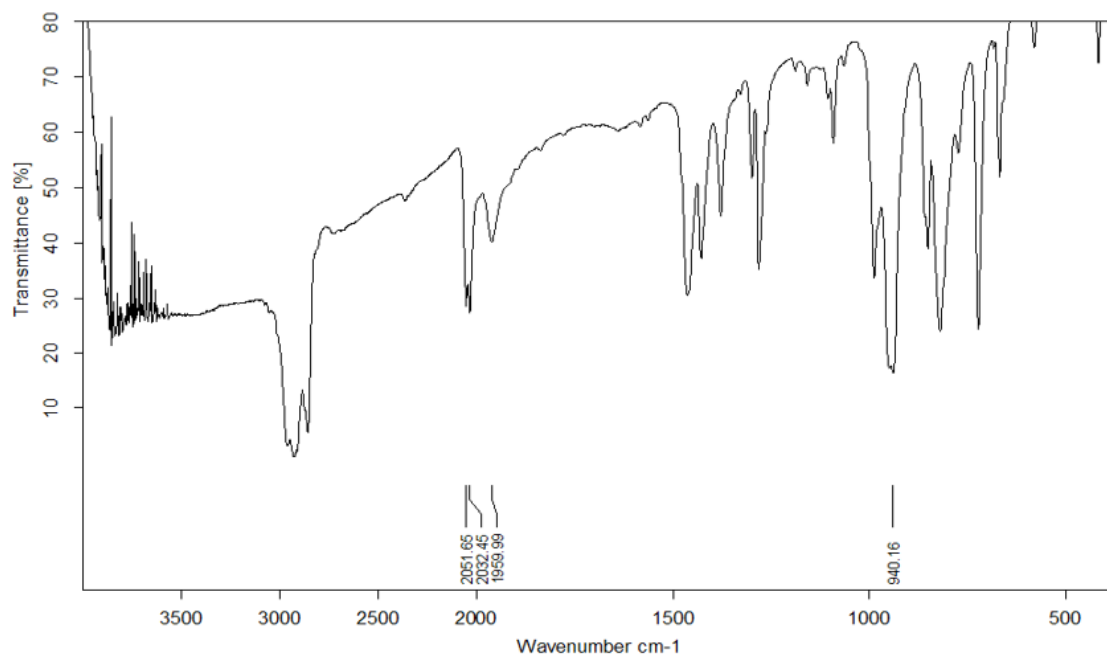

Figure S1. The IR Spectrum of complex 3

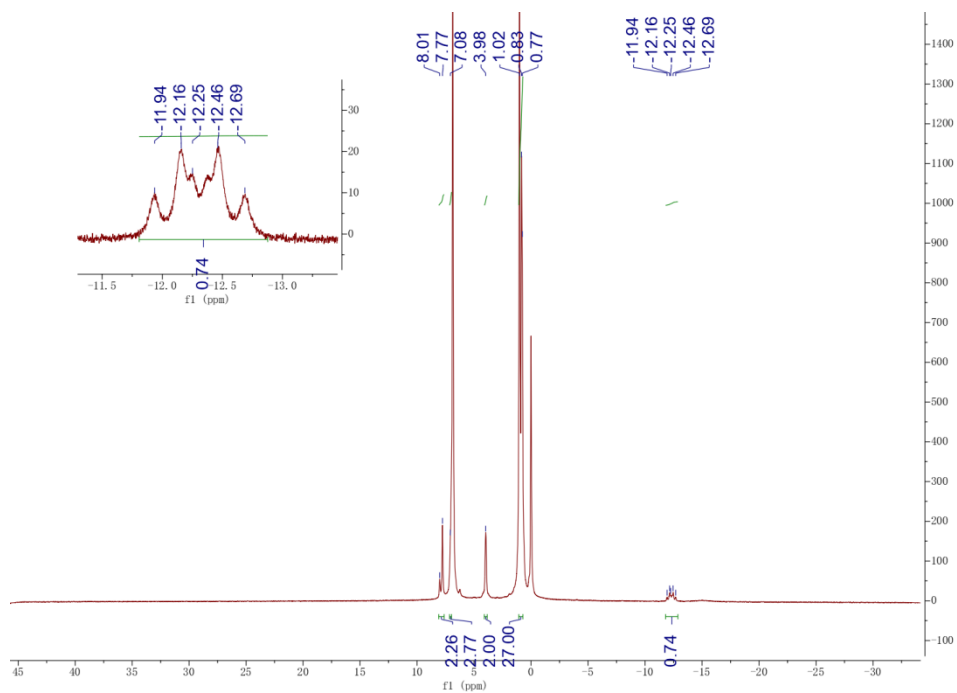

Figure S2. The  $^1\text{H}$  NMR spectrum of complex 3 in  $\text{C}_6\text{D}_6$

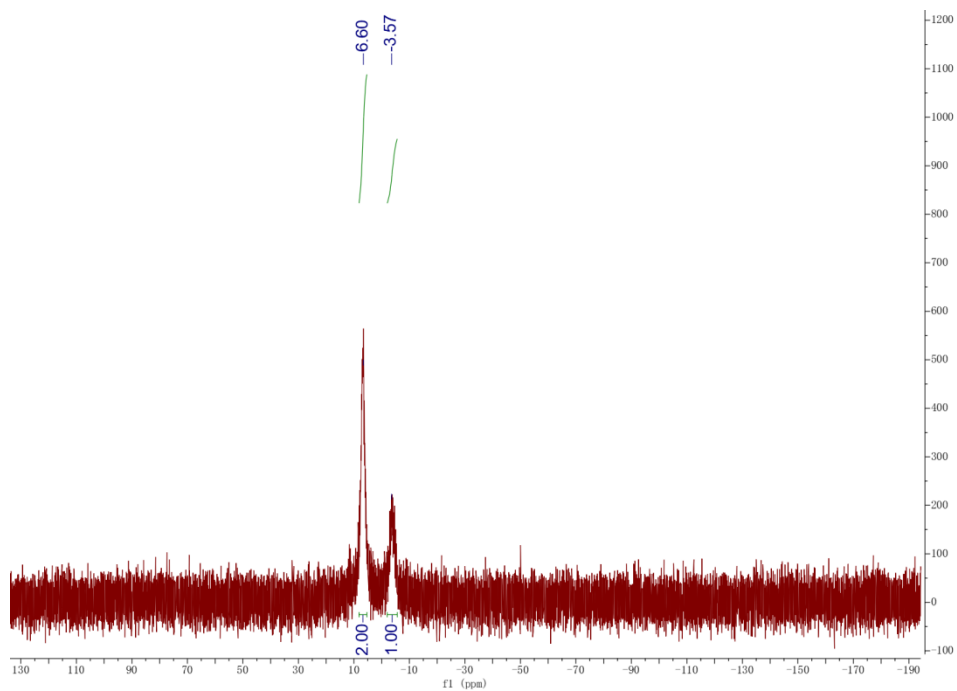

**Figure S3.** The <sup>31</sup>P NMR spectrum of complex **3** in C<sub>6</sub>D<sub>6</sub>

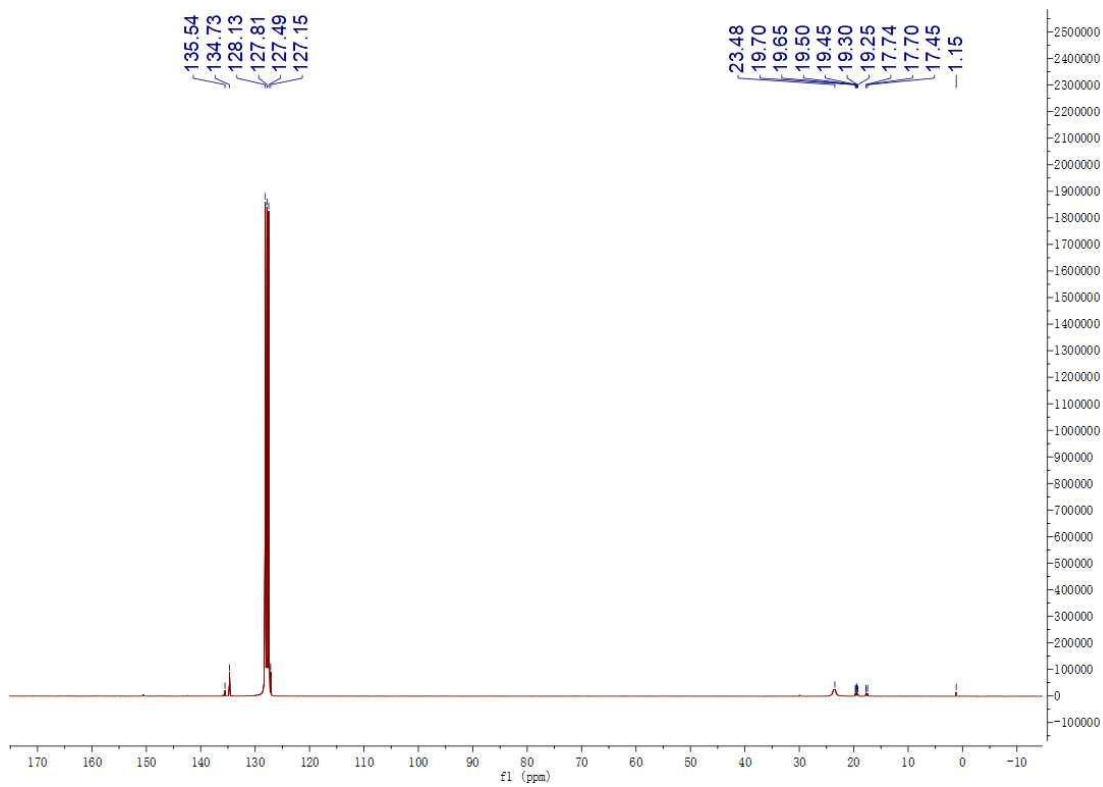

**Figure S4.** The <sup>13</sup>C NMR spectrum of complex **3** in C<sub>6</sub>D<sub>6</sub>

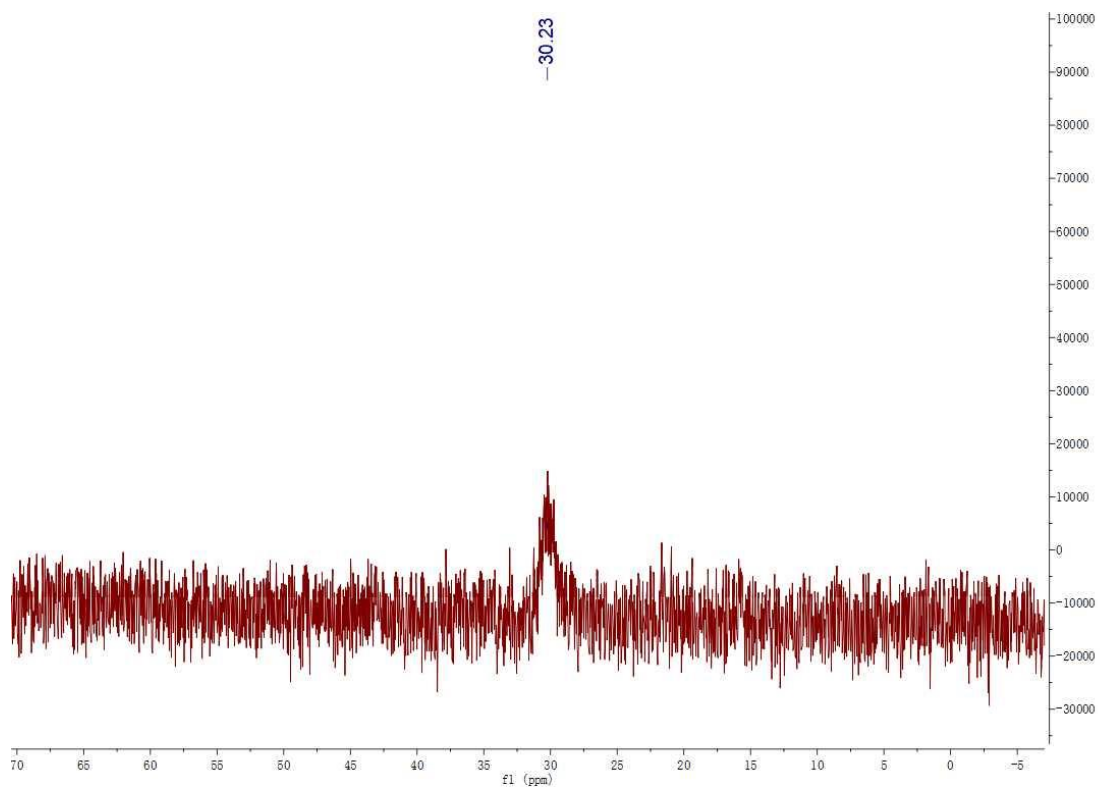

**Figure S5.** The  $^{29}\text{Si}$  NMR spectrum of complex **3** in  $\text{C}_6\text{D}_6$

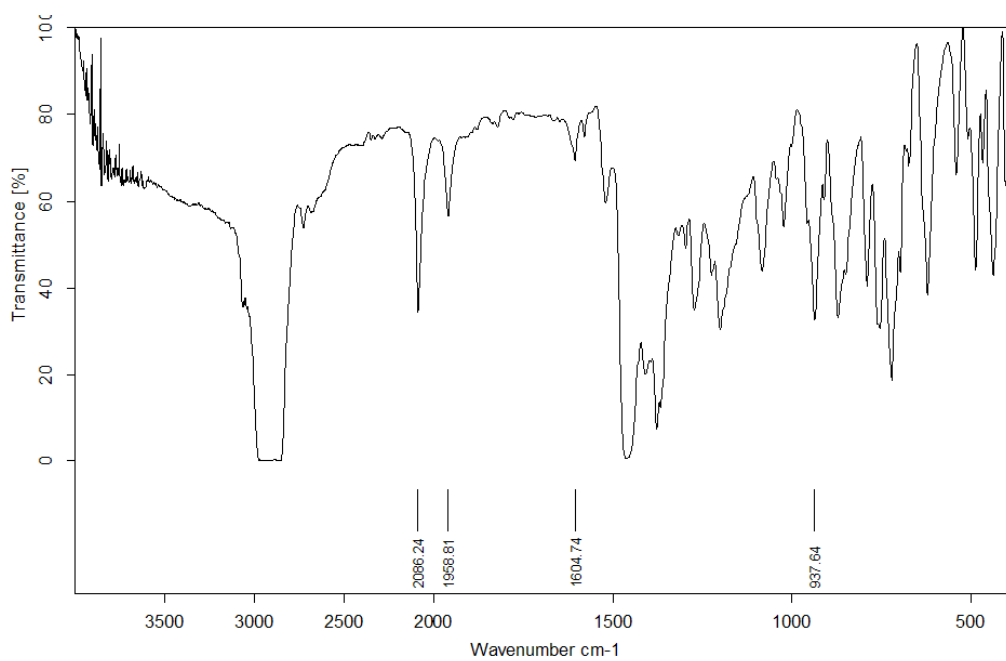

**Figure S6.** The IR spectrum of complex **4**

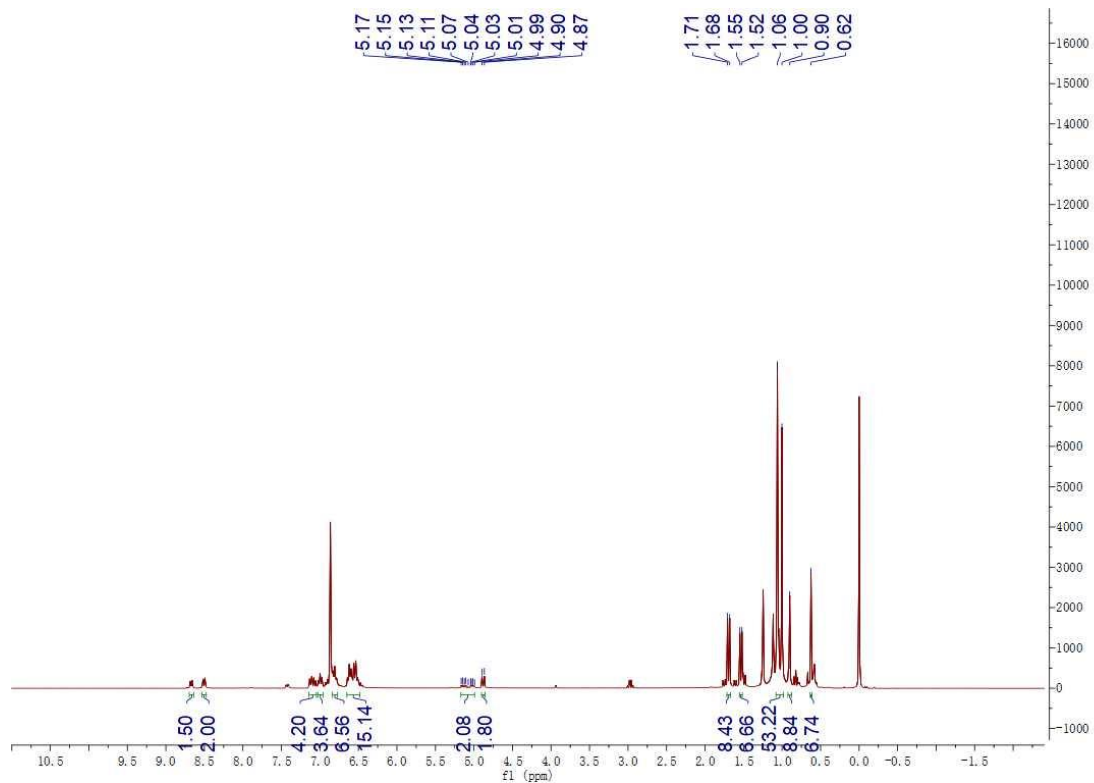

Figure S7-A. The  $^1\text{H}$  NMR spectrum of complex **4** in  $\text{C}_6\text{D}_6$

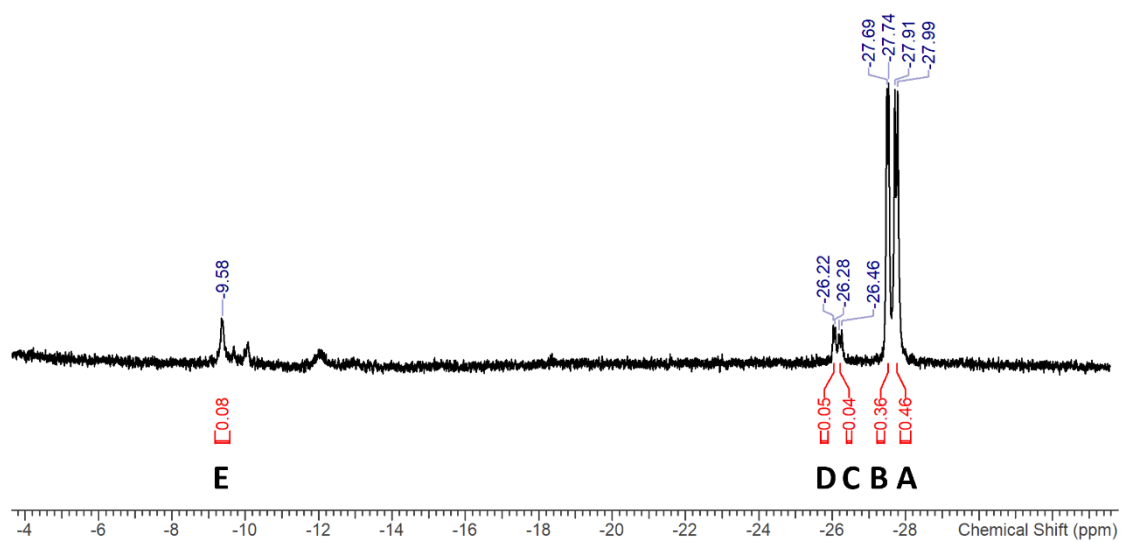

Figure S7-B. Hydride signals A-E in  $^1\text{H}$  NMR spectrum of **4** in  $\text{C}_6\text{D}_6$

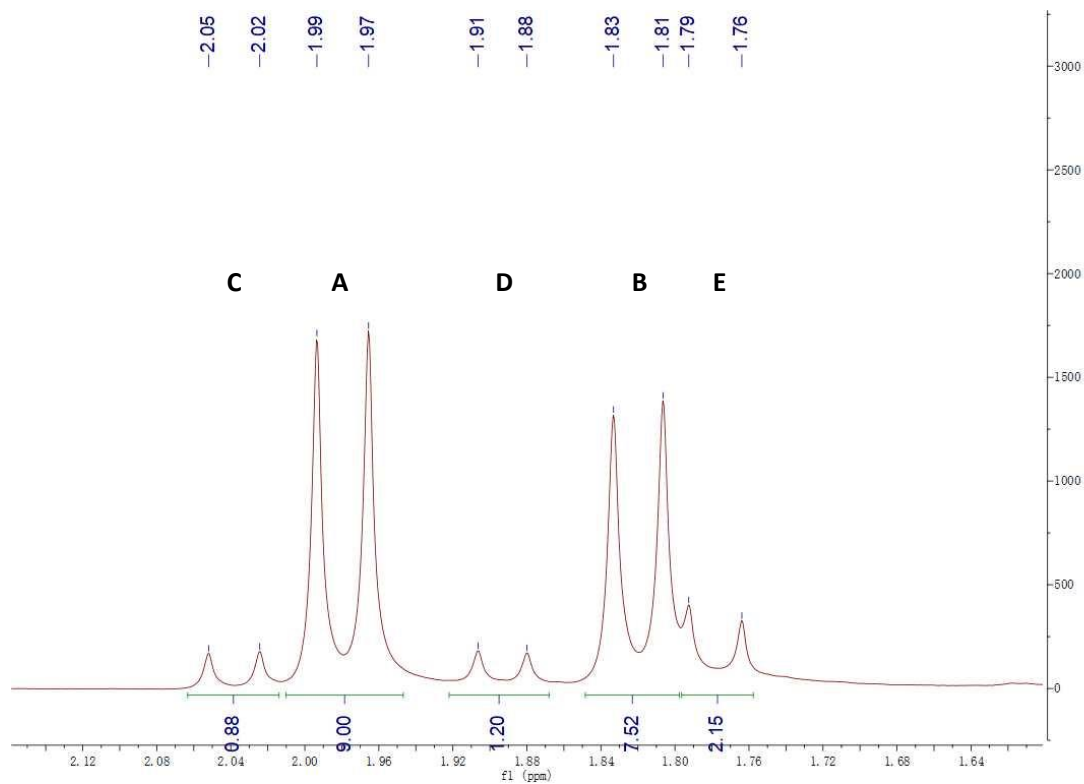

**Figure S7-C.**  $\text{PMe}_3$  doublets A-E in  $^1\text{H}$  NMR spectrum of **4** in  $\text{C}_6\text{D}_6$

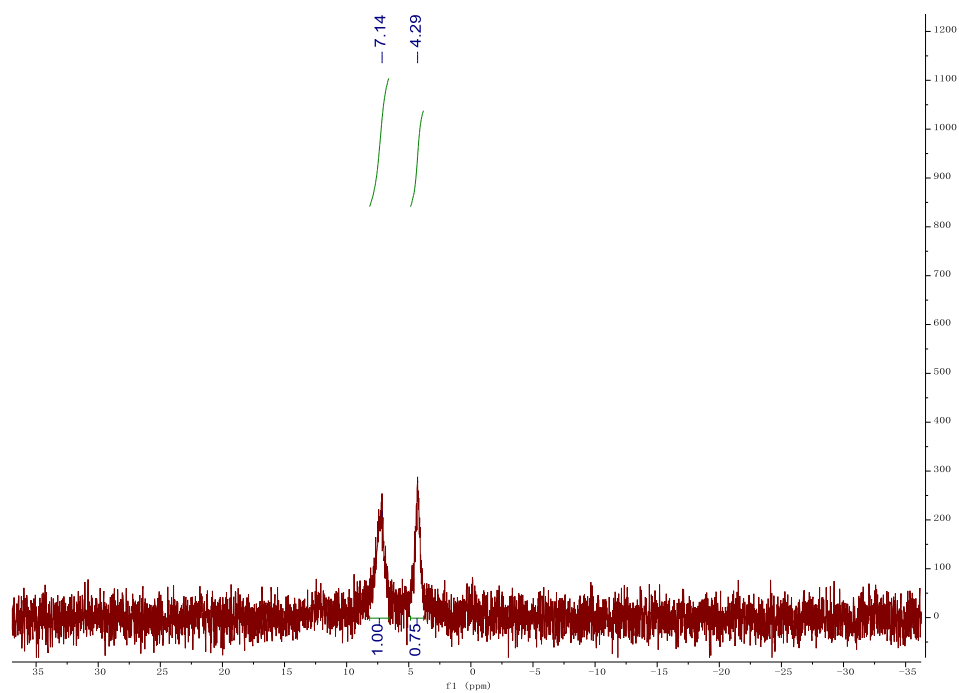

**Figure S8-A.** The  $^{31}\text{P}$  NMR of complex **4** in  $\text{C}_6\text{D}_6$

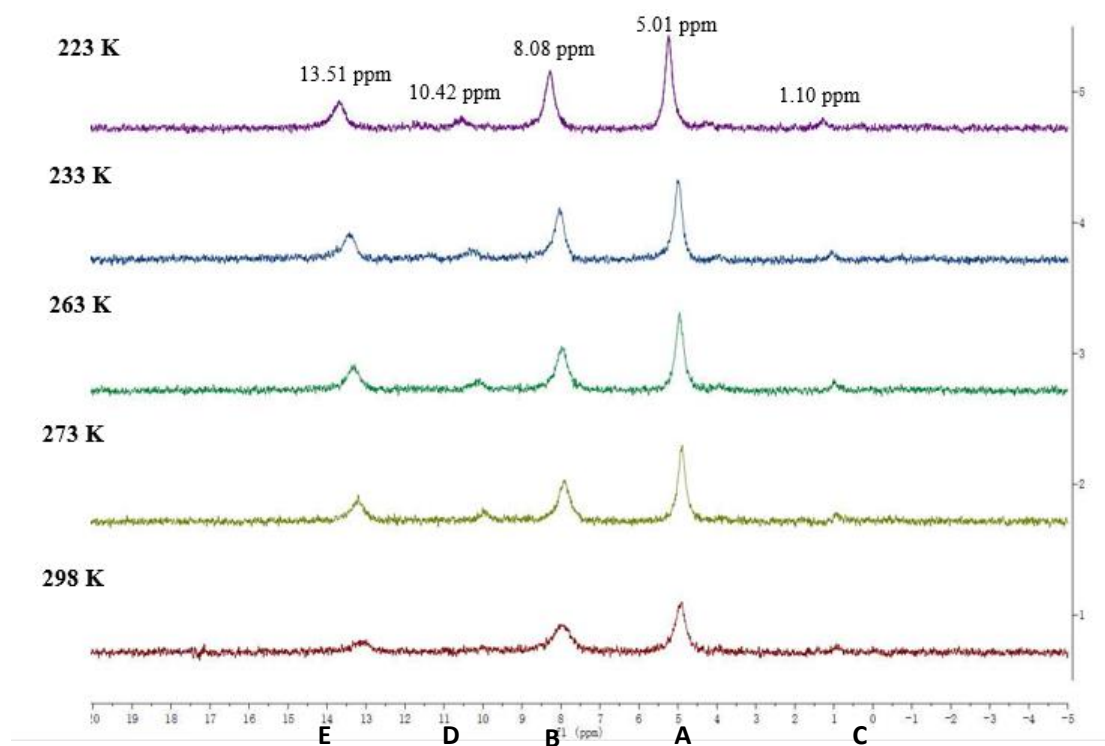

**Figure S8-B.** The VT-<sup>31</sup>P NMR of complex 4 A-E in D<sub>8</sub>-THF

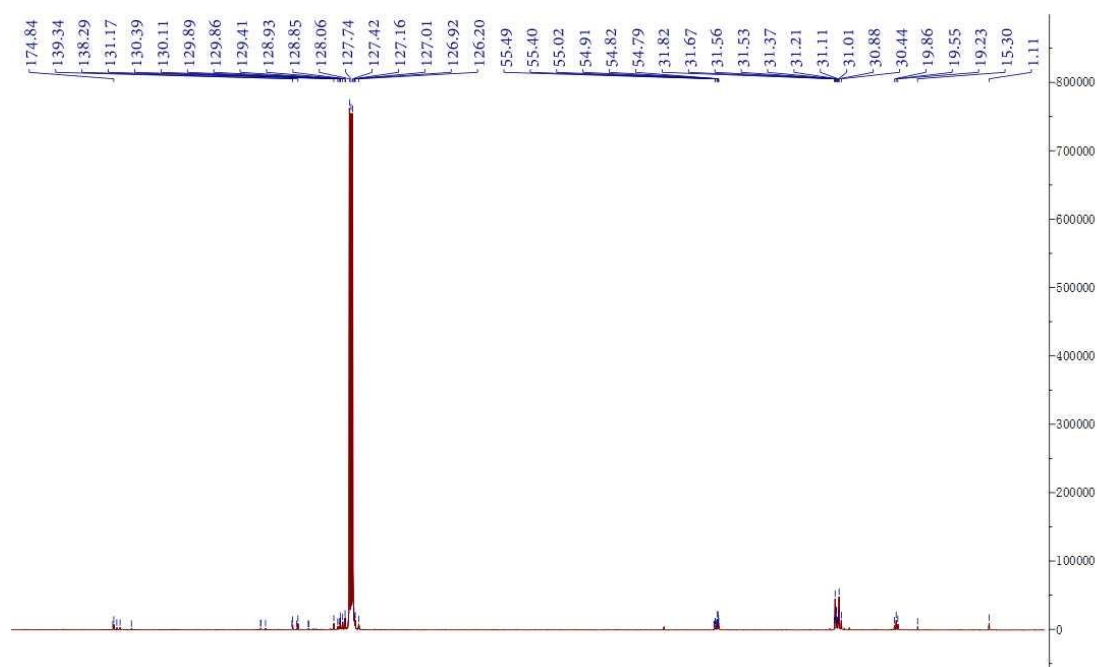

**Figure S9.** The <sup>13</sup>C NMR spectrum of complex 4 in C<sub>6</sub>D<sub>6</sub>



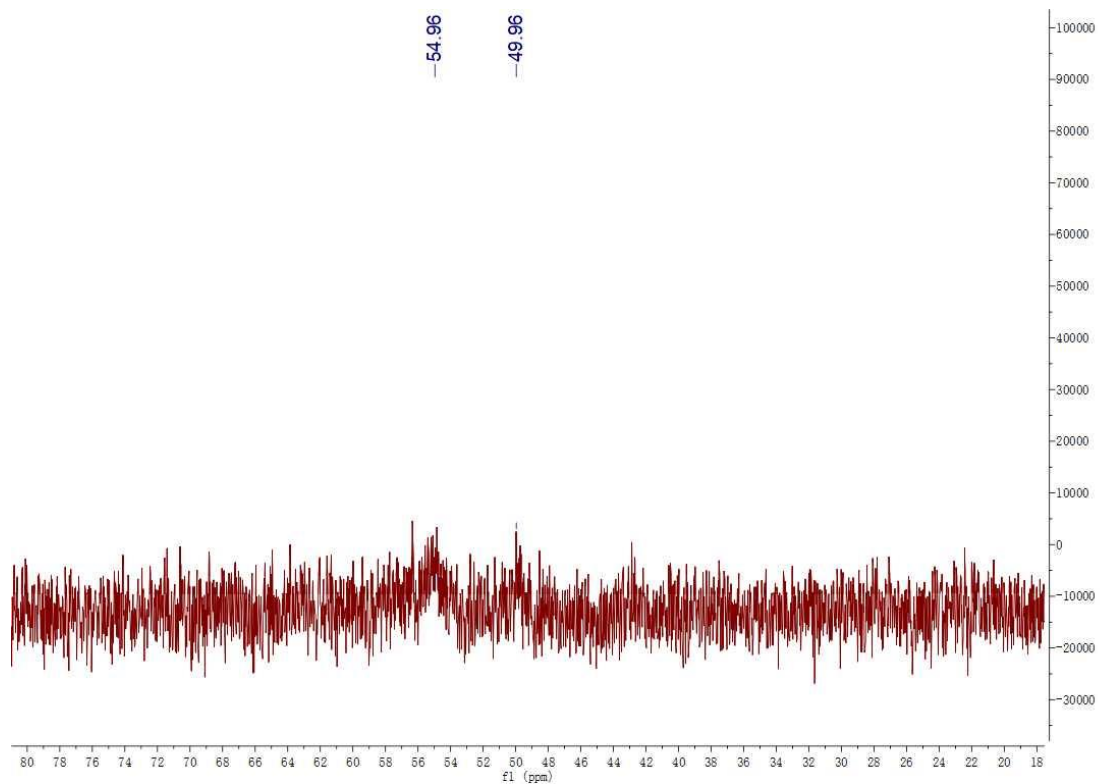

**Figure S10.** The  $^{29}\text{Si}$  NMR of complex 4 in  $\text{C}_6\text{D}_6$

### 3. $^1\text{H}$ and $^{13}\text{C}$ NMR spectra for the alcohol product

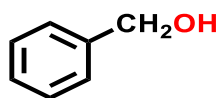

$^1\text{H}$  NMR (300 MHz,  $\text{CDCl}_3$ ,  $\delta$ ): 7.17 - 7.26 (m, Ar-H, 5H), 4.48 (s,  $\text{CH}_2$ , 2H), 2.70 (s, OH, 1H).  $^{13}\text{C}$  NMR (75 MHz,  $\text{CDCl}_3$ , 298K, ppm): 140.91 (Ar-C), 128.55 (Ar-C), 127.59 (Ar-C), 127.05 (Ar-C), 65.07 ( $\text{CH}_2$ ).

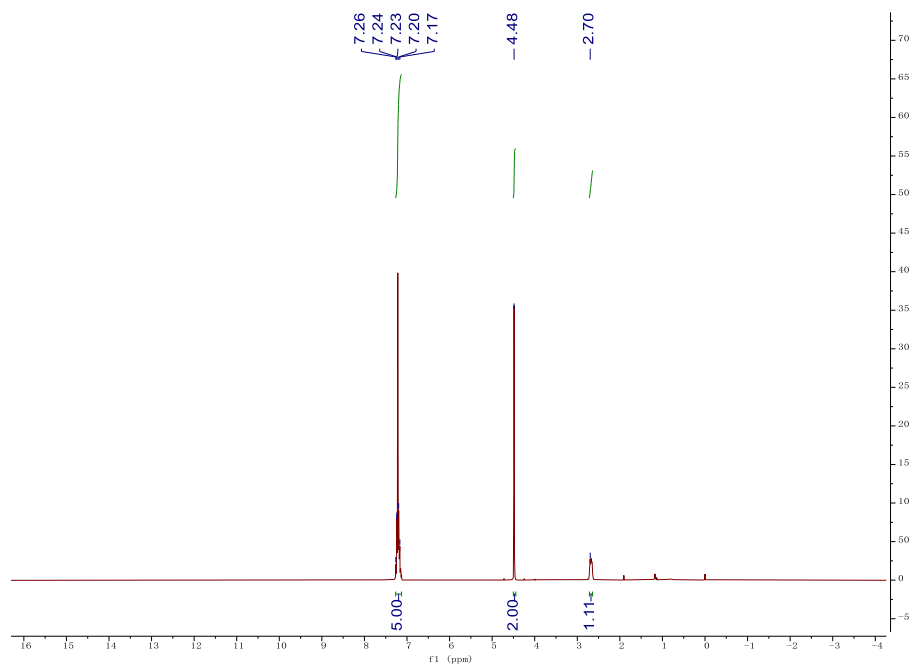

Figure S11.  $^1\text{H}$  NMR spectrum of 2a in  $\text{CDCl}_3$

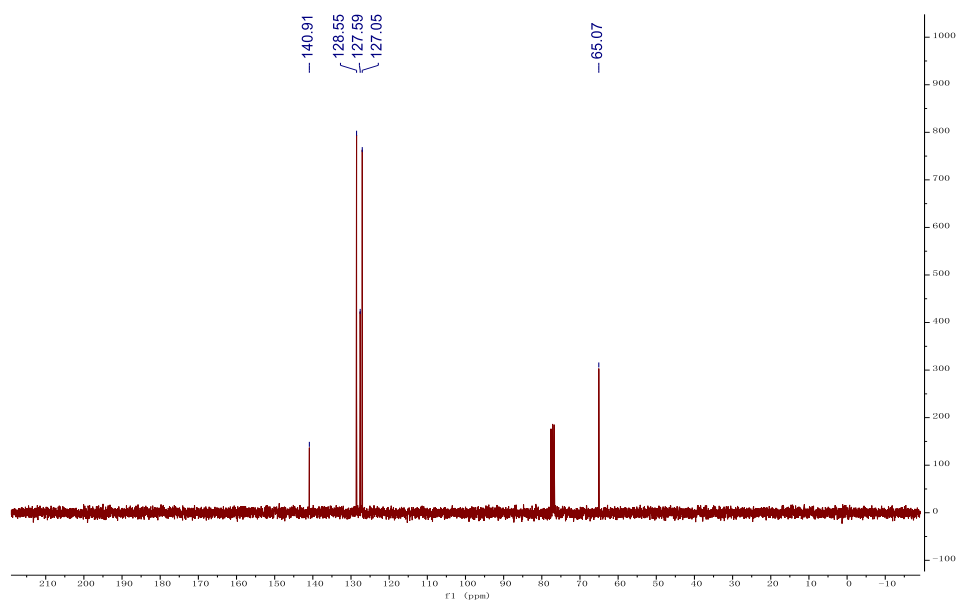

Figure S12.  $^{13}\text{C}$  NMR spectrum of 2a in  $\text{CDCl}_3$

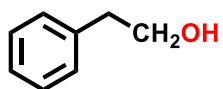

$^1\text{H NMR}$  (300 MHz,  $\text{CDCl}_3$ ,  $\delta$ ): 7.14 - 7.22 (m, Ar-H, 5H), 3.70 (t,  $\text{CH}_2$ , 2H), 3.51 (s, OH, 1H), 2.74 (t,  $\text{CH}_2$ , 2H).  $^{13}\text{C NMR}$  (75 MHz,  $\text{CDCl}_3$ , 298K, ppm): 138.94 (Ar-C), 129.18 (Ar-C), 128.60 (Ar-C), 126.45 (Ar-C), 63.51 ( $\text{CH}_2$ ), 39.27 ( $\text{CH}_2$ ).

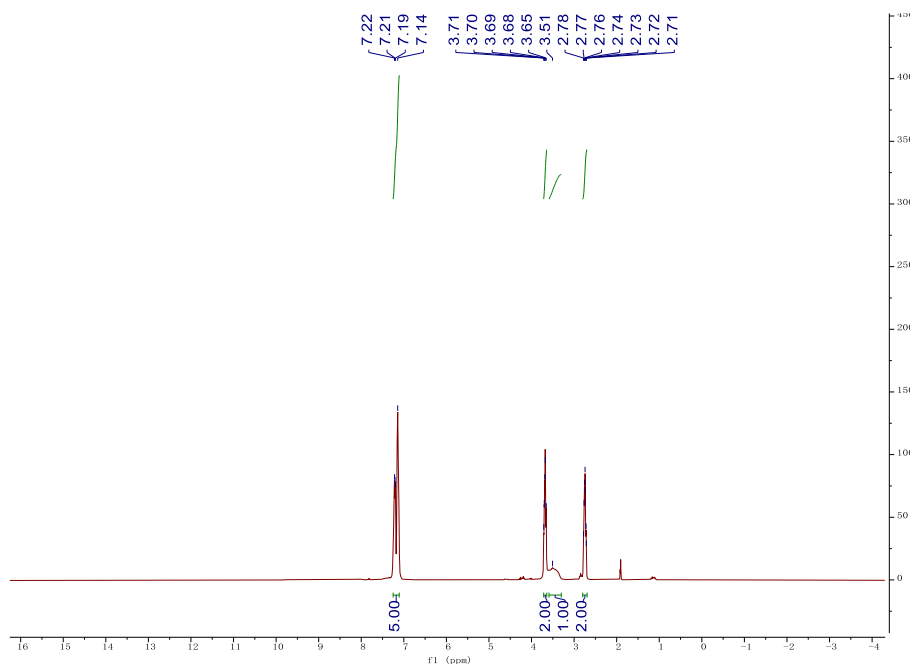

Figure S13.  $^1\text{H NMR}$  spectrum of **2b** in  $\text{CDCl}_3$

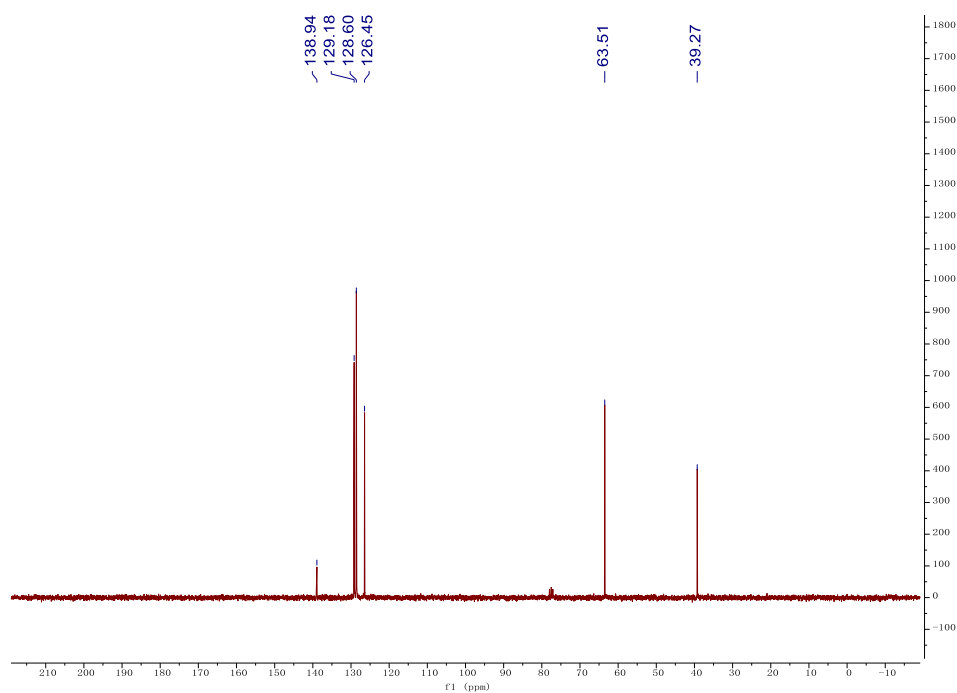

Figure S14.  $^{13}\text{C NMR}$  spectrum of **2b** in  $\text{CDCl}_3$

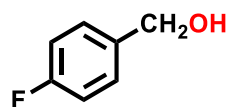

$^1\text{H}$  NMR (300 MHz,  $\text{CDCl}_3$ ,  $\delta$ ): 6.91-7.25 (m, *Ar*, 4H), 4.54 (s,  $\text{CH}_2$ , 2H), 2.03 (s, *OH*, 1H).  $^{13}\text{C}$  NMR (75 MHz,  $\text{CDCl}_3$ , 298K, ppm): 160.68 (s, *Ar-C*), 136.24 (s, *Ar-C*), 128.76 (d, *Ar-C*), 115.37 (d, *Ar-C*), 64.56 ( $\text{CH}_2$ ).

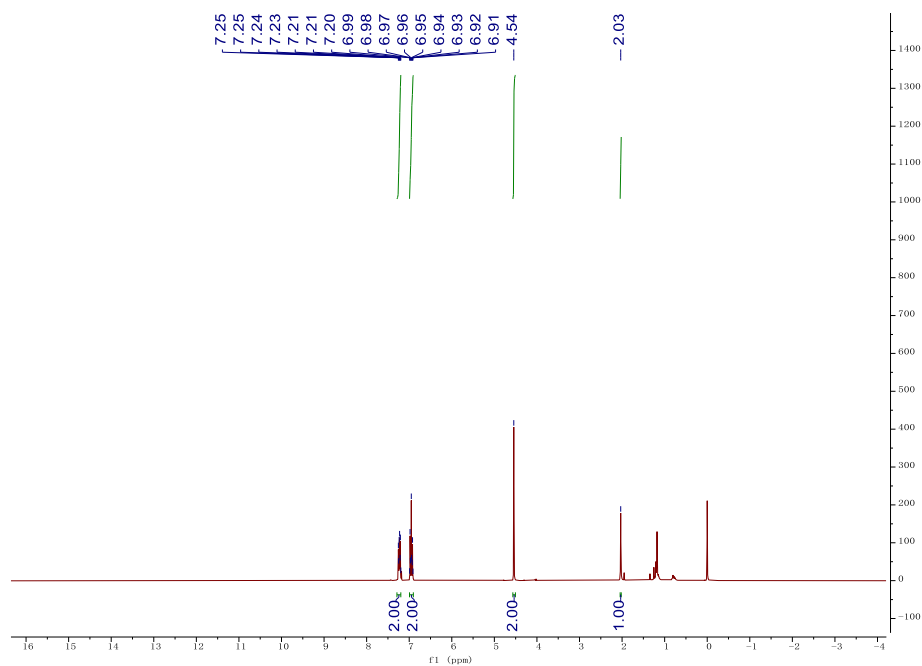

Figure S15.  $^1\text{H}$  NMR spectrum of **2c** in  $\text{CDCl}_3$

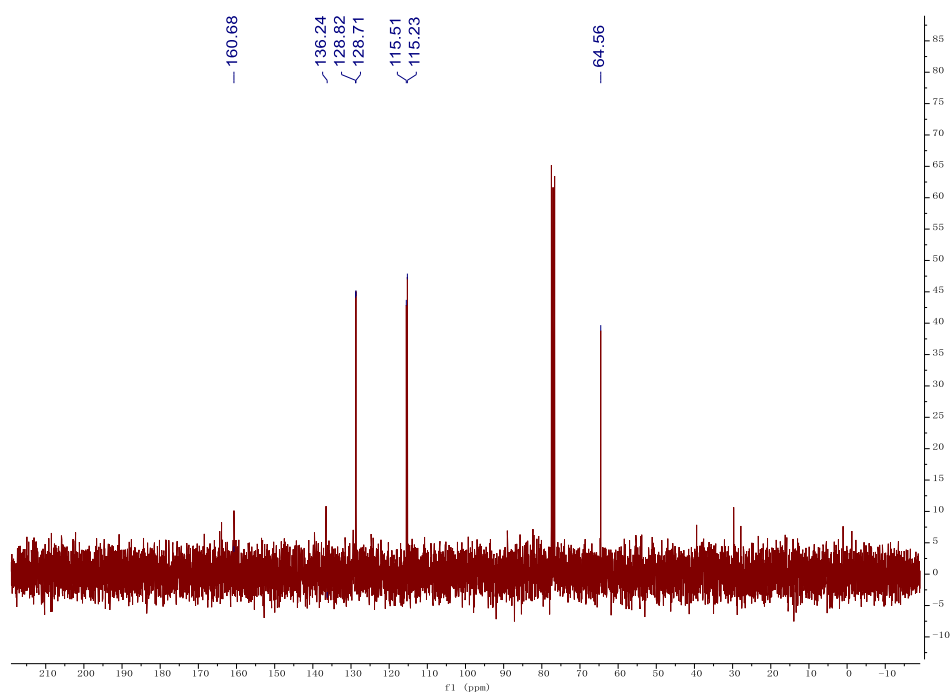

Figure S16.  $^{13}\text{C}$  NMR spectrum of **2c** in  $\text{CDCl}_3$

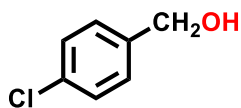

$^1\text{H}$  NMR (300 MHz,  $\text{CDCl}_3$ ,  $\delta$ ): 7.15-7.25 (m, *Ar*, 4H), 4.51 (s,  $\text{CH}_2$ , 2H), 2.29 (s,  $\text{OH}$ , 1H).  $^{13}\text{C}$  NMR (75 MHz,  $\text{CDCl}_3$ , 298K, ppm): 139.95 (Ar-C), 134.03 (Ar-C), 129.37 (Ar-C), 128.99 (Ar-C), 65.12 ( $\text{CH}_2$ ).

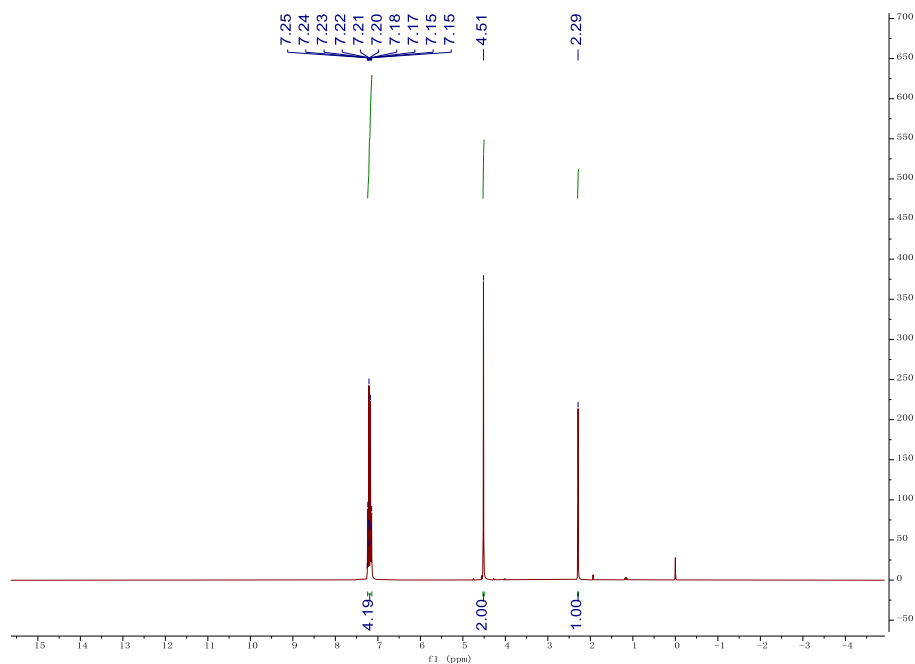

Figure S17.  $^1\text{H}$  NMR spectrum of **2d** in  $\text{CDCl}_3$

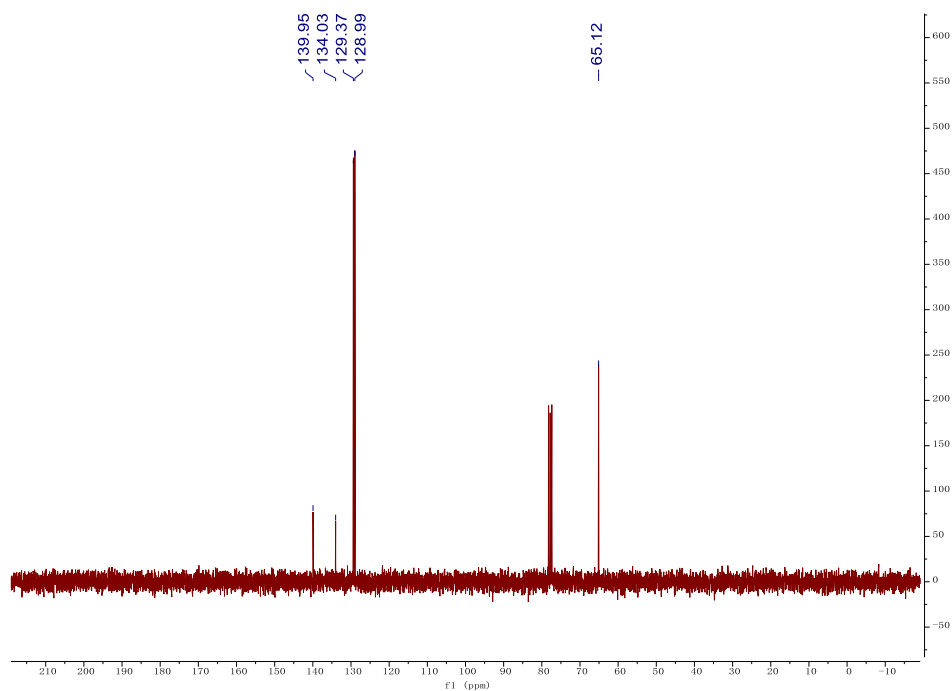

Figure S18.  $^{13}\text{C}$  NMR spectrum of **2d** in  $\text{CDCl}_3$

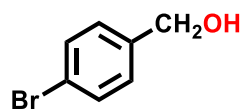

$^1\text{H}$  NMR (300 MHz,  $\text{CDCl}_3$ ,  $\delta$ ): 7.19-7.37 (m, *Ar*, 4H), 4.41 (s,  $\text{CH}_2$ , 2H), 2.33 (s,  $\text{OH}$ , 1H).  $^{13}\text{C}$  NMR (75 MHz,  $\text{CDCl}_3$ , 298K, ppm): 131.71 (Ar-C), 128.52 (Ar-C), 128.35 (Ar-C), 122.56 (Ar-C), 51.55 ( $\text{CH}_2$ ).

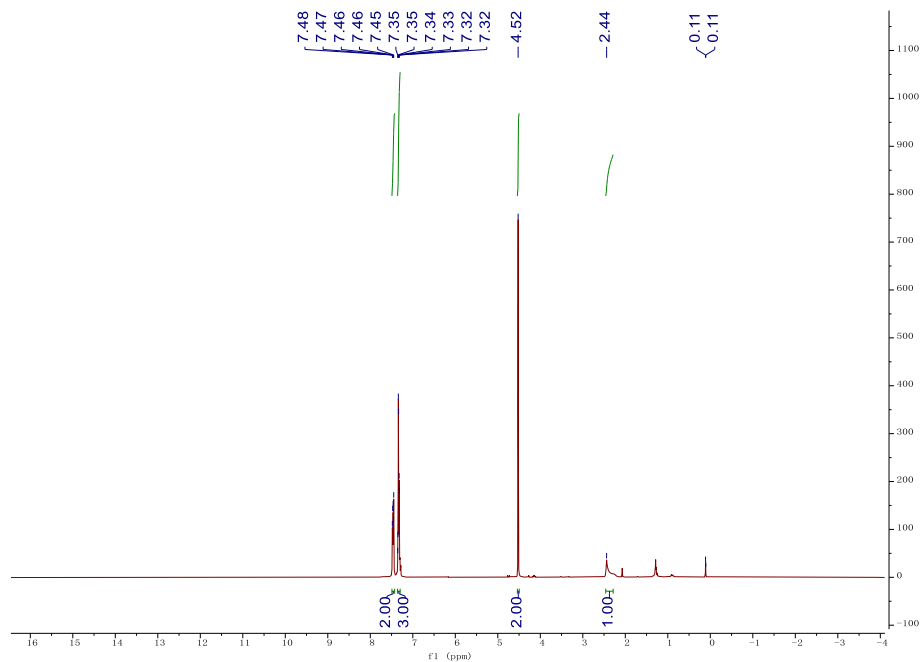

Figure S19.  $^1\text{H}$  NMR spectrum of **2e** in  $\text{CDCl}_3$

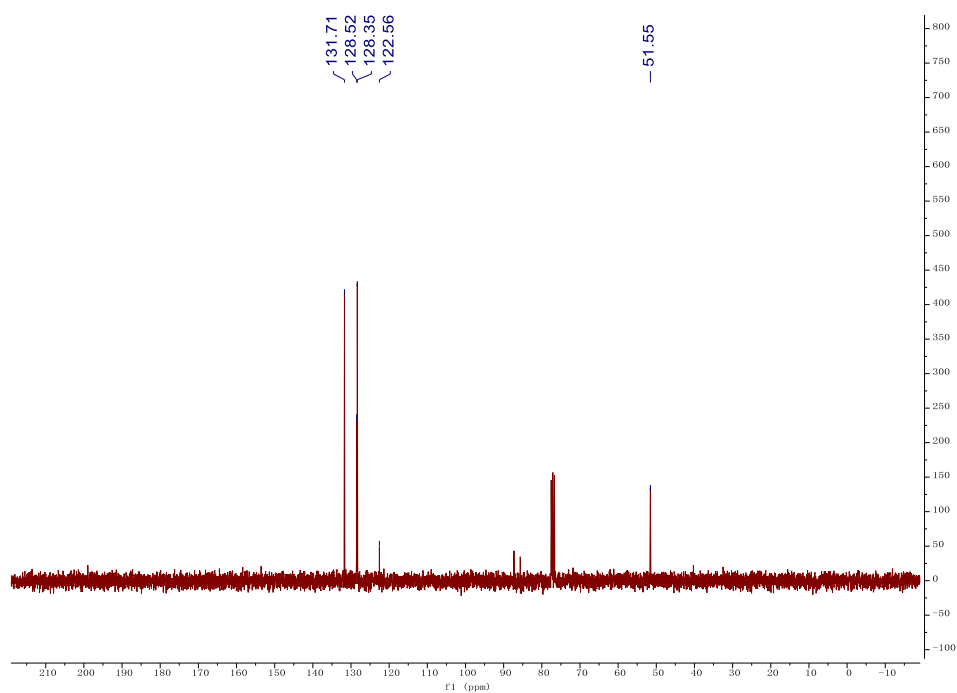

Figure S20.  $^{13}\text{C}$  NMR spectrum of **2e** in  $\text{CDCl}_3$

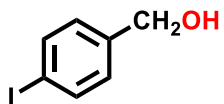

$^1\text{H}$  NMR (300 MHz,  $\text{CDCl}_3$ ,  $\delta/\text{ppm}$ ): 7.59 (d, Ar-H, 2H), 7.01 (d, Ar-H, 2H), 4.53 (s,  $\text{CH}_2$ , 2H), 1.97 (s, OH, 1H).  $^{13}\text{C}$  NMR (75 MHz,  $\text{CDCl}_3$ , 298K, ppm): 140.42 (Ar-C), 137.59 (Ar-C), 128.82 (Ar-C), 93.01 (Ar-C), 64.59 ( $\text{CH}_2$ ).

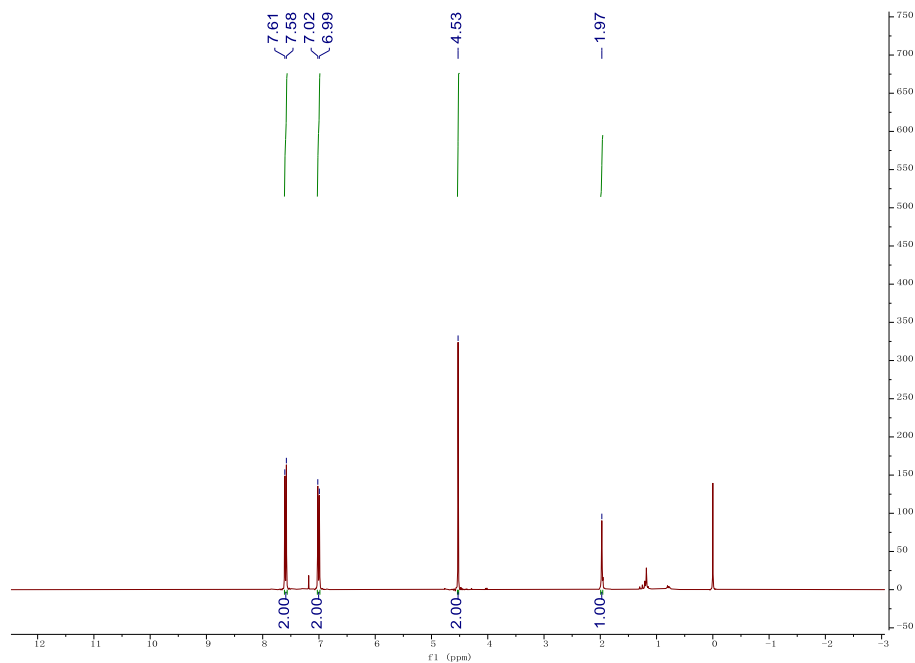

Figure S21.  $^1\text{H}$  NMR spectrum of **2f** in  $\text{CDCl}_3$

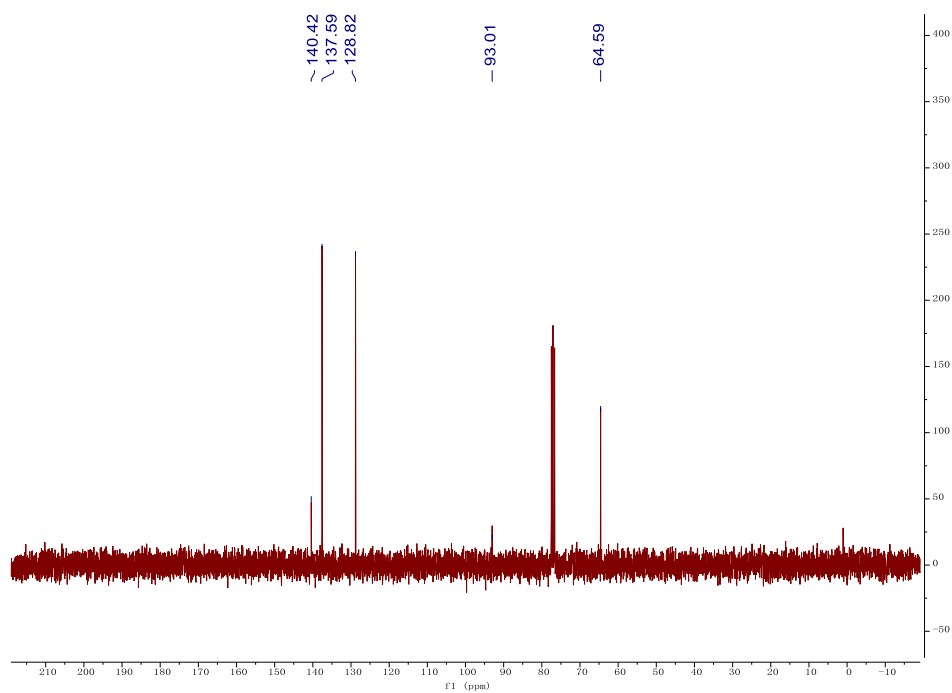

Figure S22.  $^{13}\text{C}$  NMR spectrum of **2f** in  $\text{CDCl}_3$

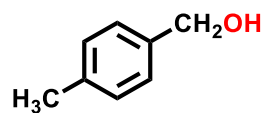

$^1\text{H}$  NMR (300 MHz,  $\text{CDCl}_3$ ,  $\delta/\text{ppm}$ ): 7.25 (d, Ar-H, 2H), 7.17 (d, Ar-H, 2H), 4.64 (s,  $\text{CH}_2$ , 2H), 2.35 (s,  $\text{CH}_3$ , 3H), 1.66 (s, OH, 1H).  $^{13}\text{C}$  NMR (75 MHz,  $\text{CDCl}_3$ , 298K, ppm): 137.93 (Ar-C), 137.41 (Ar-C), 129.25 (Ar-C), 127.12 (Ar-C), 65.29 ( $\text{CH}_2$ ), 21.14 ( $\text{CH}_2$ ).

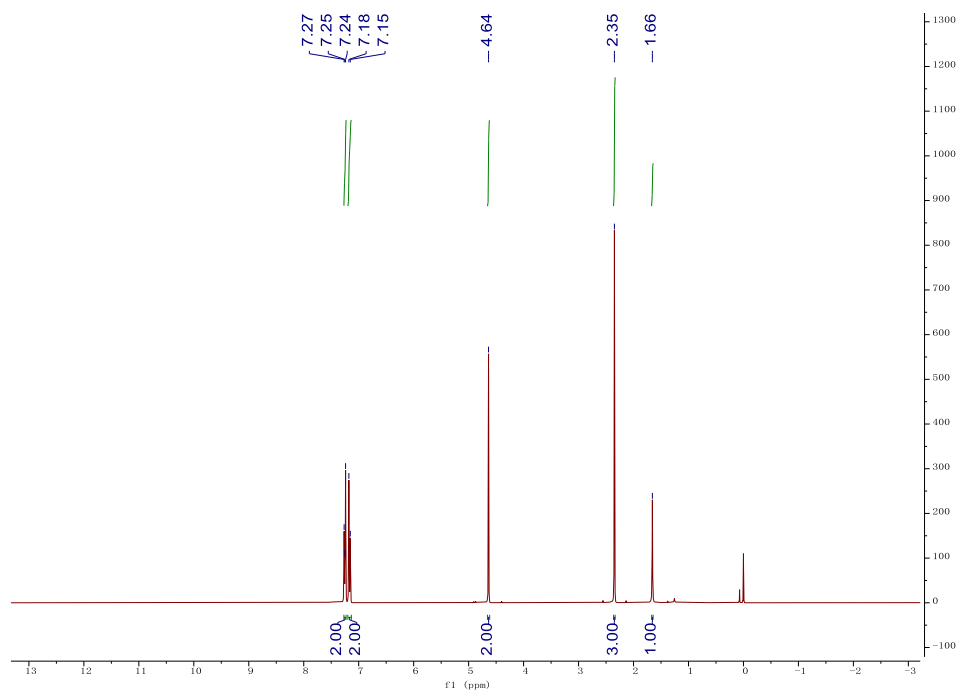

Figure S23.  $^1\text{H}$  NMR spectrum of **2g** in  $\text{CDCl}_3$

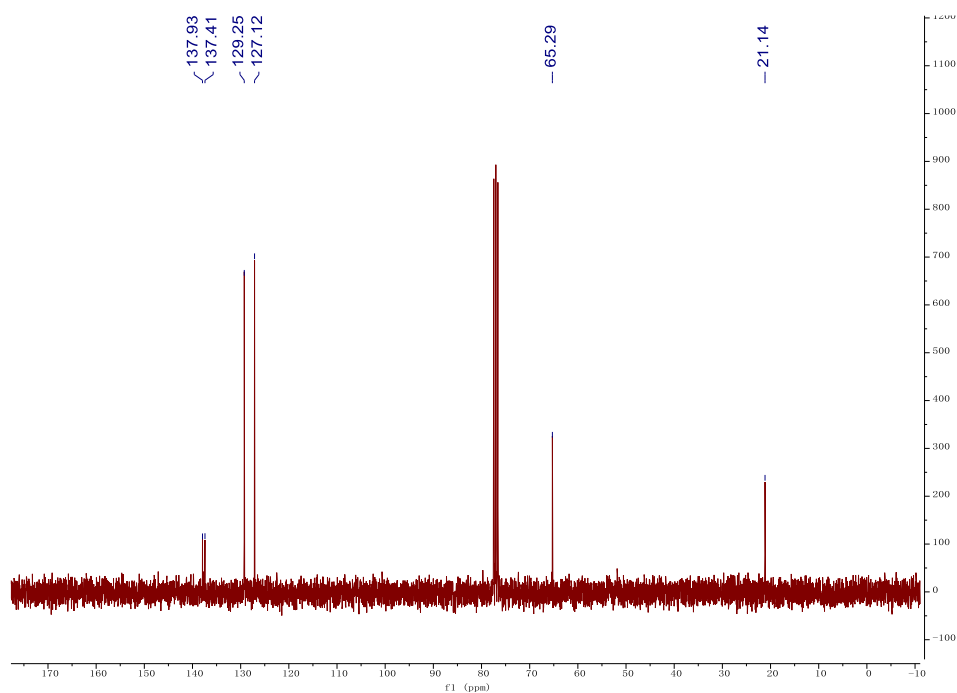

Figure S24.  $^{13}\text{C}$  NMR spectrum of **2g** in  $\text{CDCl}_3$



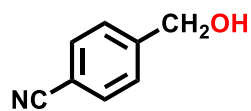

$^1\text{H}$  NMR (300 MHz,  $\text{CDCl}_3$ ,  $\delta$ ): 7.38–7.56 (m, *Ar*, 4H), 4.68 (s,  $\text{CH}_2$ , 2H), 2.32 (s,  $\text{OH}$ , 1H).  $^{13}\text{C}$  NMR (75 MHz,  $\text{CDCl}_3$ , 298K, ppm): 146.42 (Ar-C), 132.29 (Ar-C), 127.02 (Ar-C), 118.90 (Ar-C), 110.95 (Ar-C), 64.07 ( $\text{CH}_2$ ).

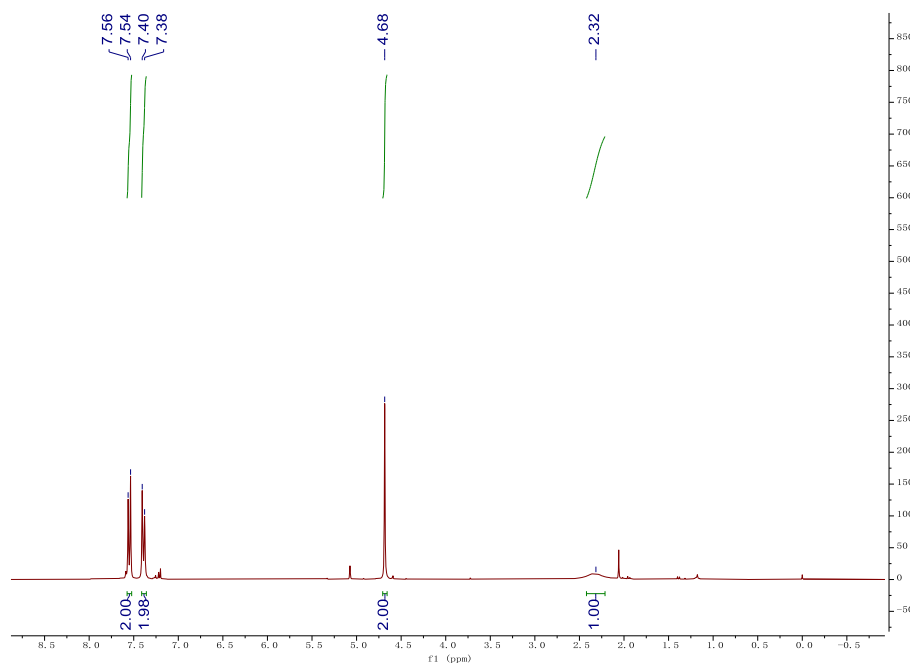

Figure S25.  $^1\text{H}$  NMR spectrum of **2h** in  $\text{CDCl}_3$

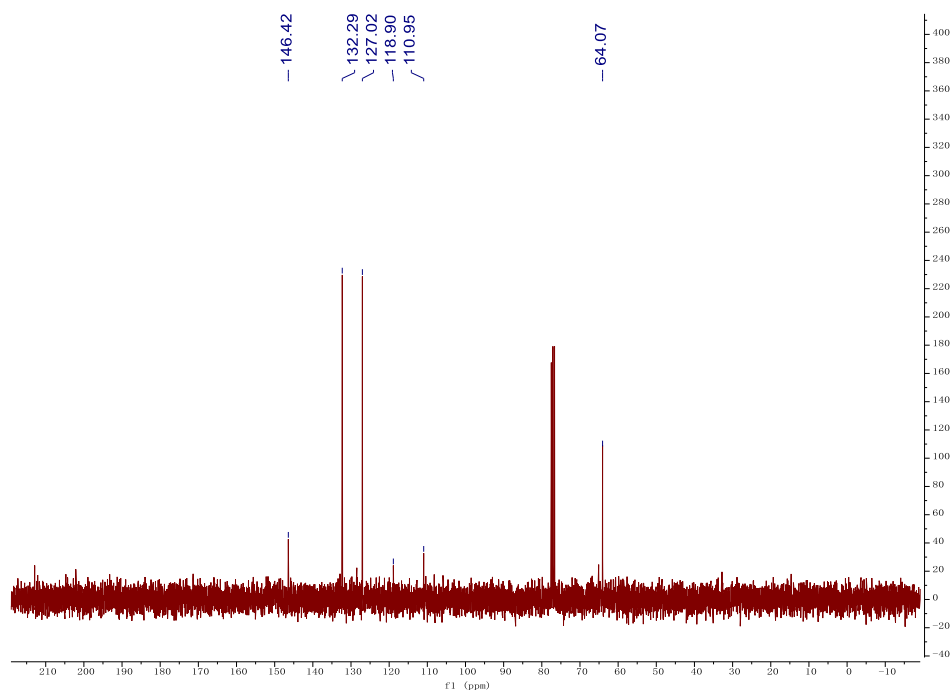

Figure S26.  $^{13}\text{C}$  NMR spectrum of **2h** in  $\text{CDCl}_3$

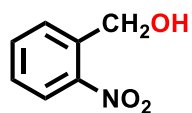

$^1\text{H NMR}$  (300 MHz,  $\text{CDCl}_3$ ,  $\delta/\text{ppm}$ ): 8.10 (dd, Ar-H, 1H), 7.75 (dd, Ar-H, 1H), 7.68 (td, Ar-H, 1H), 7.48 (ddd, Ar-H, 1H), 4.98 (s,  $\text{CH}_2$ , 2H), 2.56 (s, OH, 1H).  $^{13}\text{C NMR}$  (75 MHz,  $\text{CDCl}_3$ , 298K, ppm): 136.77 (Ar-C), 134.14 (Ar-C), 130.02 (Ar-C), 128.52 (Ar-C), 125.03 (Ar-C), 62.57 ( $\text{CH}_2$ ).

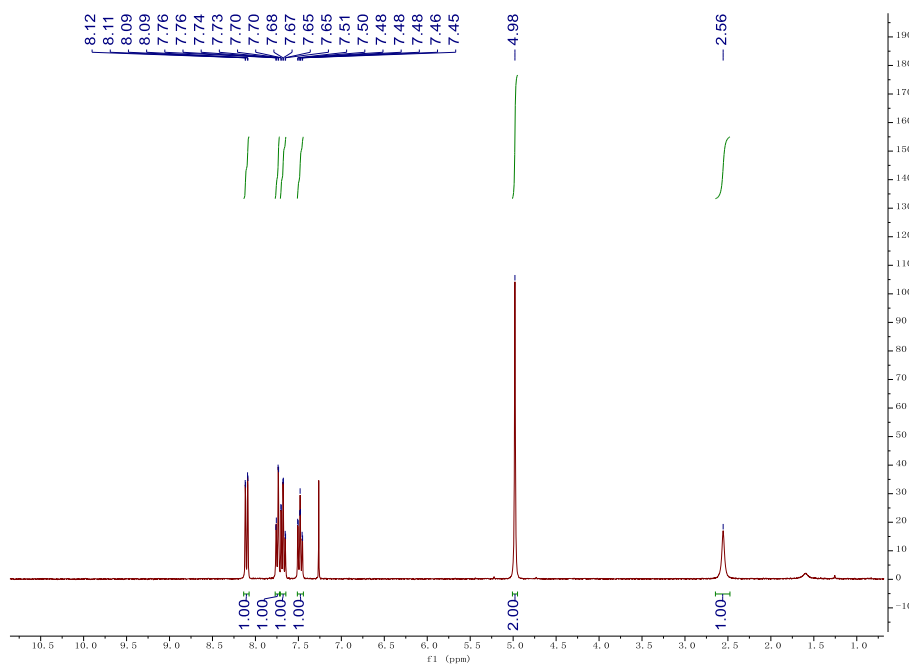

Figure S27.  $^1\text{H NMR}$  spectrum of **2i** in  $\text{CDCl}_3$

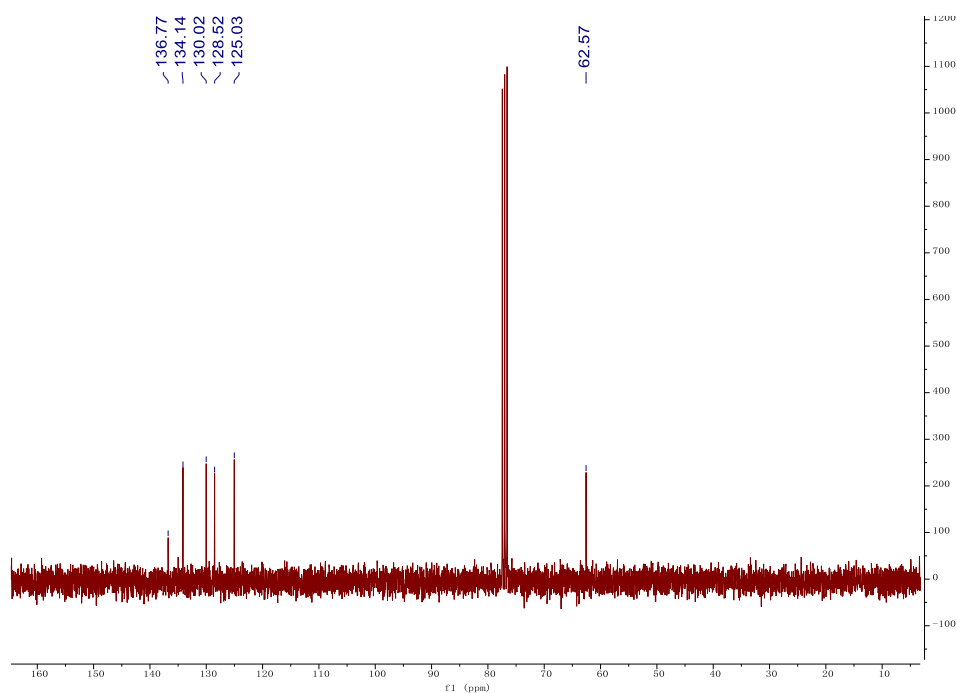

Figure S28.  $^{13}\text{C NMR}$  spectrum of **2i** in  $\text{CDCl}_3$

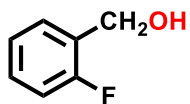

$^1\text{H}$  NMR (300 MHz,  $\text{CDCl}_3$ ,  $\delta/\text{ppm}$ ): 6.88 - 7.31 (m, Ar-H, 4H), 4.59 (s,  $\text{CH}_2$ , 2H), 2.87 (s, OH, 1H).  $^{13}\text{C}$  NMR (75 MHz,  $\text{CDCl}_3$ , 298K, ppm): 162.19 (Ar-C), 158.93 (Ar-C), 129.32 (d, Ar-C), 129.24 (d, Ar-C), 124.20 (d, Ar-C), 115.19 (d, Ar-C), 59.00 (d,  $\text{CH}_2$ ).

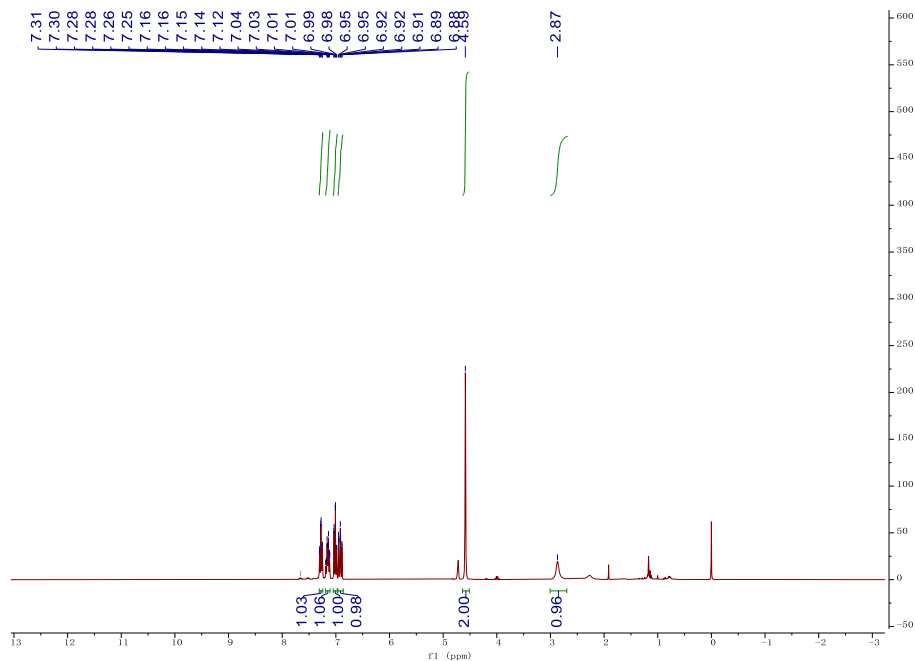

Figure S29.  $^1\text{H}$  NMR spectrum of **2j** in  $\text{CDCl}_3$

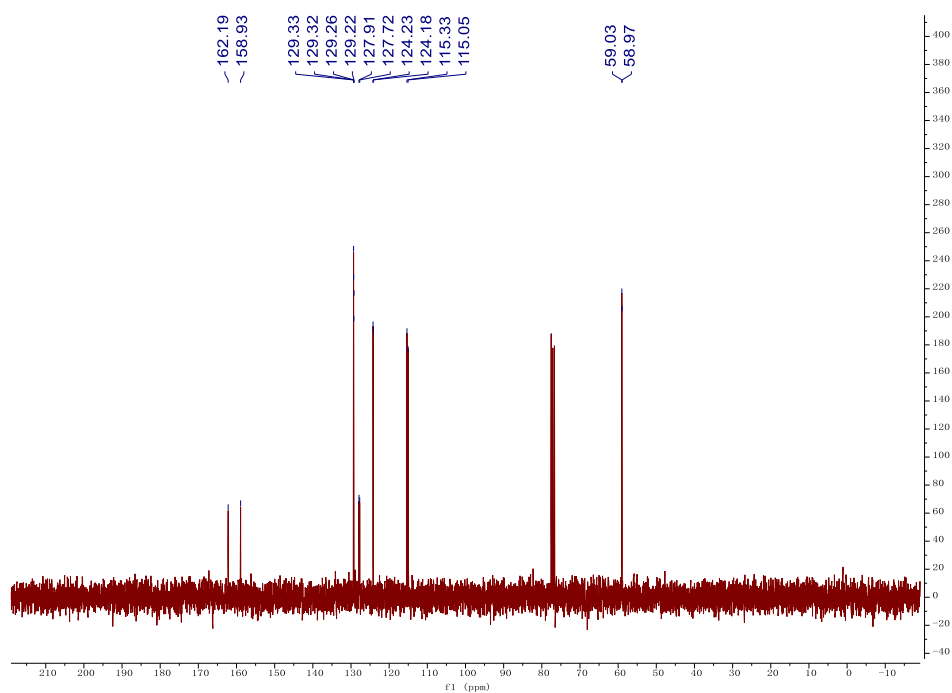

Figure S30.  $^{13}\text{C}$  NMR spectrum of **2j** in  $\text{CDCl}_3$

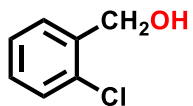

$^1\text{H}$  NMR (300 MHz,  $\text{CDCl}_3$ ,  $\delta$ ): 7.12-7.40 (m, *Ar*, 4H), 4.68 (s,  $\text{CH}_2$ , 2H), 2.18 (s,  $\text{OH}$ , 1H).  $^{13}\text{C}$  NMR (75 MHz,  $\text{CDCl}_3$ , 298K, ppm): 138.16 (Ar-C), 132.70 (Ar-C), 129.34 (Ar-C), 128.83 (Ar-C), 128.72 (Ar-C), 127.03 (Ar-C), 62.80 ( $\text{CH}_2$ ).

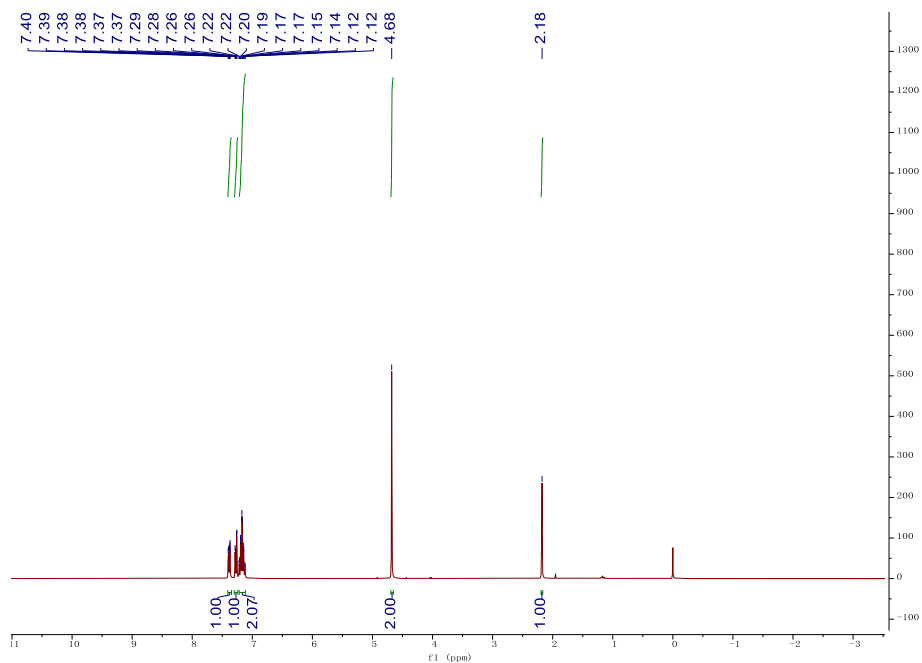

Figure S31.  $^1\text{H}$  NMR spectrum of **2k** in  $\text{CDCl}_3$

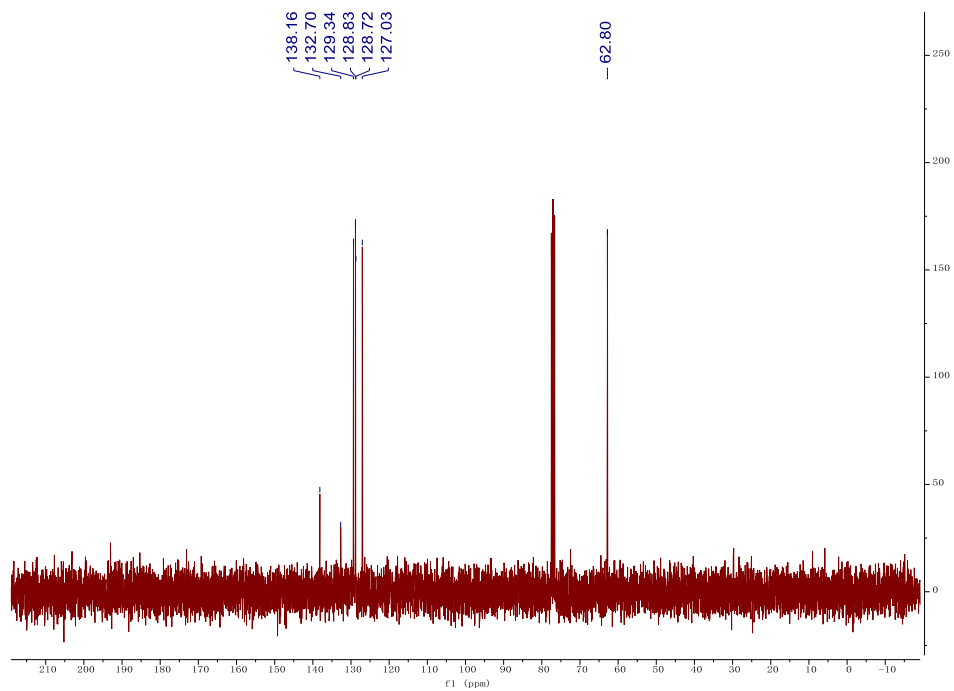

Figure S32.  $^{13}\text{C}$  NMR spectrum of **2k** in  $\text{CDCl}_3$

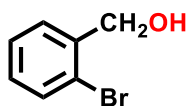

$^1\text{H NMR}$  (300 MHz,  $\text{CDCl}_3$ ,  $\delta$ ): 7.43 (dd, Ar-H, 1H), 7.36 (dd, Ar-H, 1H), 7.22 (td, Ar-H, 1H), 7.05 (td, Ar-H, 1H), 4.61 (s,  $\text{CH}_2$ , 2H), 2.51 (s, OH, 1H).  $^{13}\text{C NMR}$  (75 MHz,  $\text{CDCl}_3$ , 298K, ppm): 139.72 (Ar-C), 132.56 (Ar-C), 129.08 (Ar-C), 128.81 (Ar-C), 127.65 (Ar-C), 122.51 (Ar-C), 64.92 ( $\text{CH}_2$ ).

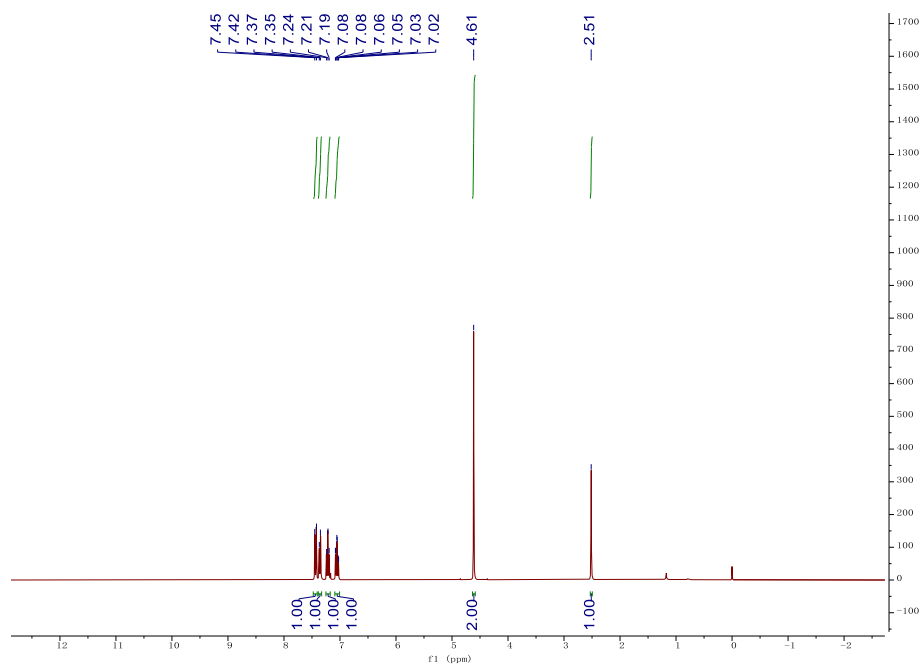

Figure S33.  $^1\text{H NMR}$  spectrum of **2I** in  $\text{CDCl}_3$

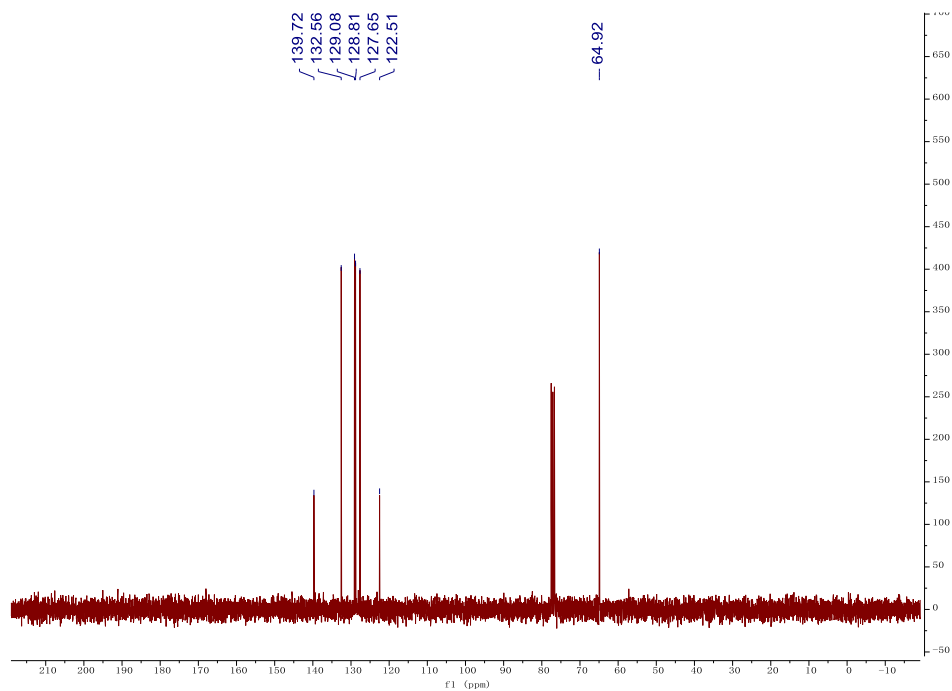

Figure S34.  $^{13}\text{C NMR}$  spectrum of **2I** in  $\text{CDCl}_3$

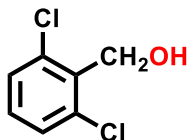

$^1\text{H NMR}$  (300 MHz,  $\text{CDCl}_3$ ,  $\delta$ ): 7.23 (d, Ar-H, 2H), 7.07 (dd, Ar-H, 1H), 4.84 (s,  $\text{CH}_2$ , 2H), 2.36 (s, OH, 1H).  $^{13}\text{C NMR}$  (75 MHz,  $\text{CDCl}_3$ , 298K, ppm): 135.99 (Ar-C), 135.66 (Ar-C), 129.79 (Ar-C), 128.46 (Ar-C), 60.08 ( $\text{CH}_2$ ).

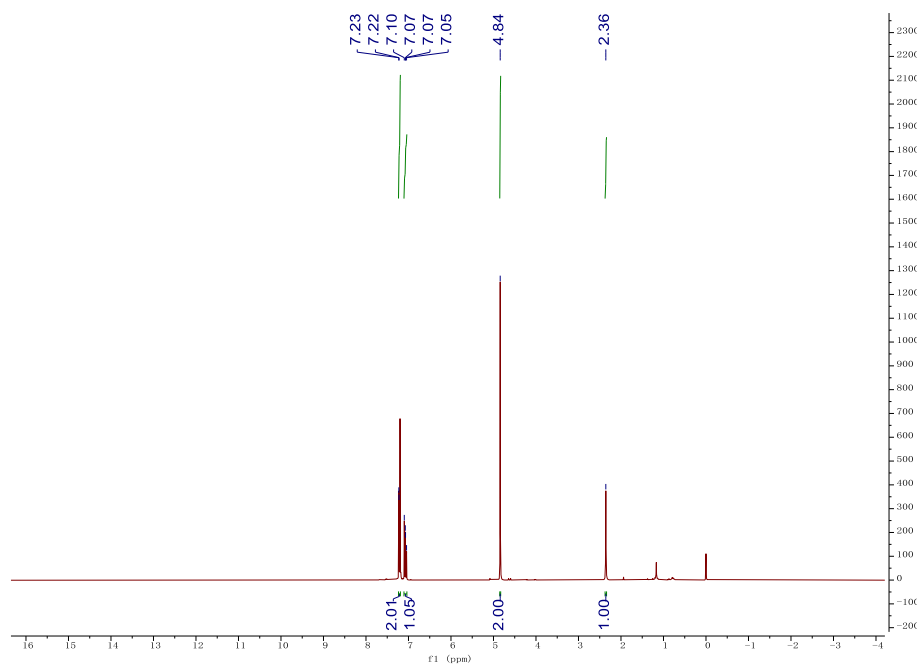

Figure S35.  $^1\text{H NMR}$  spectrum of **2m** in  $\text{CDCl}_3$

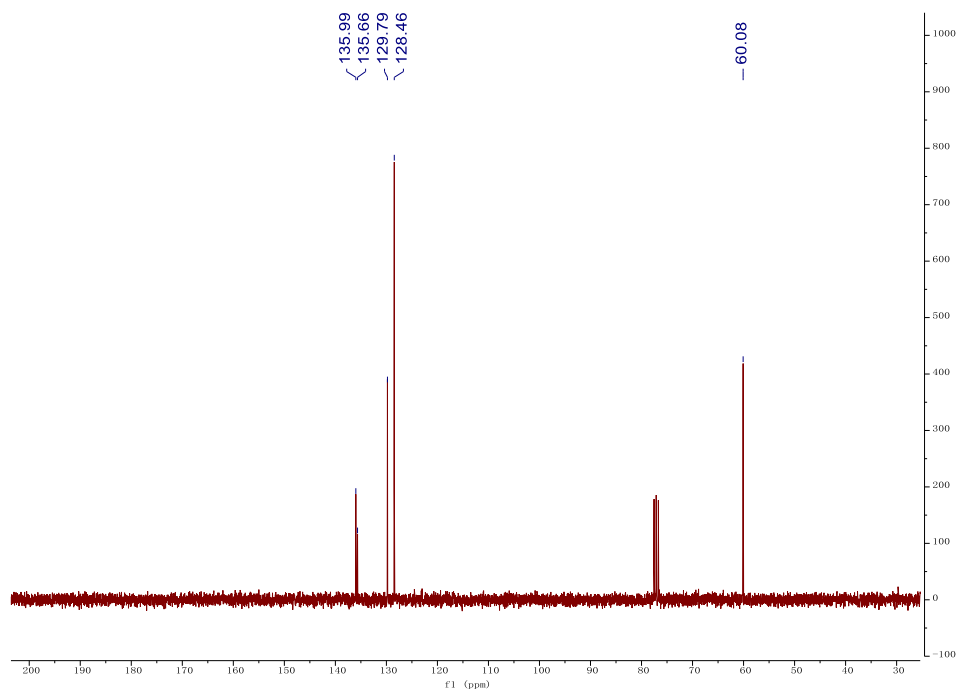

Figure S36.  $^{13}\text{C NMR}$  spectrum of **2m** in  $\text{CDCl}_3$

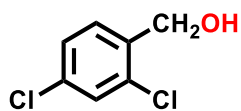

$^1\text{H NMR}$  (300 MHz,  $\text{CDCl}_3$ ,  $\delta$ ): 7.25 (d, Ar-H, 1H), 7.22 (d, Ar-H, 1H), 7.10 (dd, Ar-H, 1H), 4.55 (s,  $\text{CH}_2$ , 2H), 3.02 (s, OH, 1H).  $^{13}\text{C NMR}$  (75 MHz,  $\text{CDCl}_3$ , 298K, ppm): 136.77 (Ar-C), 133.85 (Ar-C), 133.20 (Ar-C), 129.43 (Ar-C), 129.14 (Ar-C), 127.29 (Ar-C), 62.20 ( $\text{CH}_2$ ).

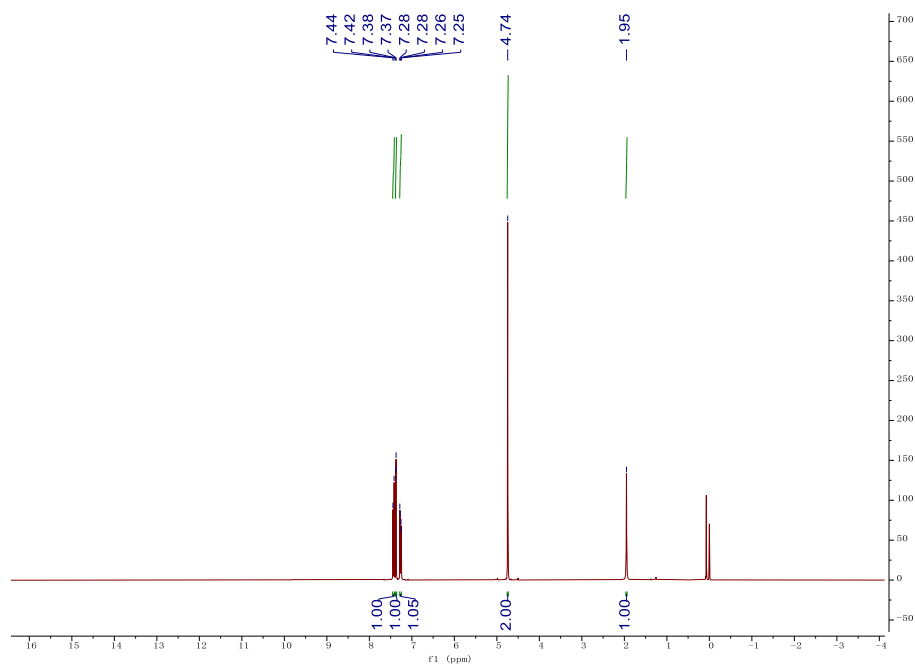

Figure S37.  $^1\text{H NMR}$  spectrum of **2n** in  $\text{CDCl}_3$

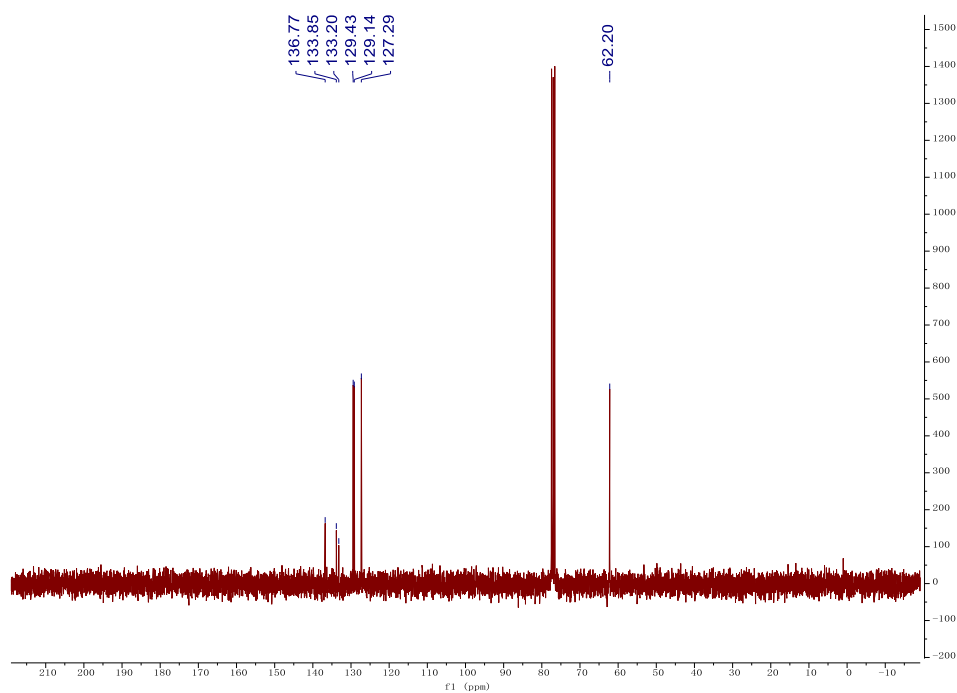

Figure S38.  $^{13}\text{C NMR}$  spectrum of **2n** in  $\text{CDCl}_3$

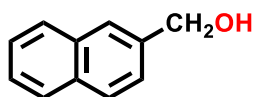

$^1\text{H}$  NMR (300 MHz,  $\text{CDCl}_3$ ,  $\delta$ ): 7.16-7.78 (m, Ar-H, 7H), 4.71 (s,  $\text{CH}_2$ , 2H), 2.93 (s, OH, 1H).  $^{13}\text{C}$  NMR (75 MHz,  $\text{CDCl}_3$ , 298K, ppm): 136.35 (Ar-C), 133.80 (Ar-C), 131.26 (Ar-C), 128.72 (Ar-C), 128.45 (Ar-C), 126.33 (Ar-C), 125.90 (Ar-C), 125.50 (Ar-C), 125.27 (Ar-C), 123.74 (Ar-C), 63.20 ( $\text{CH}_2$ ).

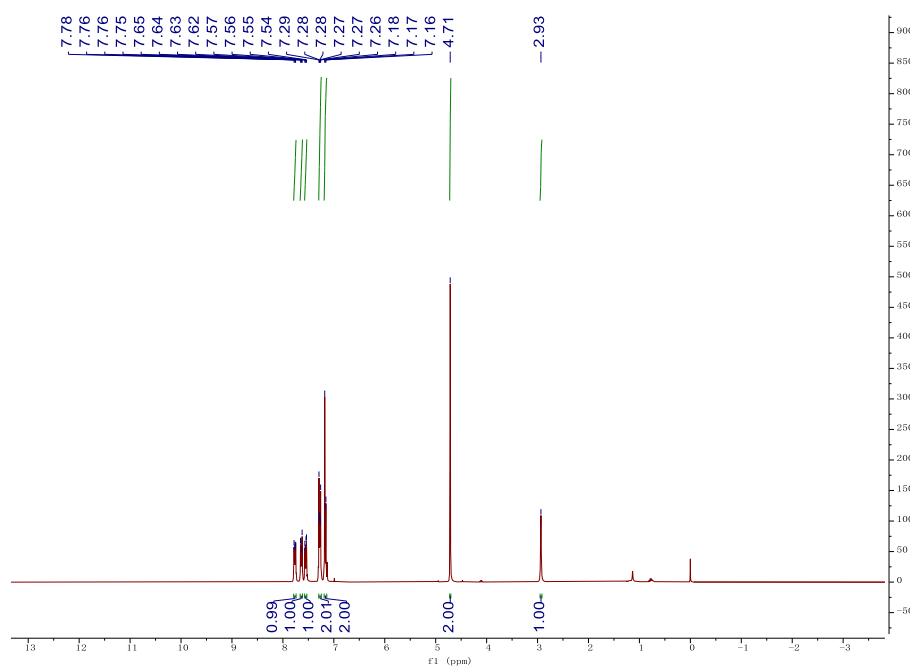

Figure S39.  $^1\text{H}$  NMR spectrum of **2o** in  $\text{CDCl}_3$

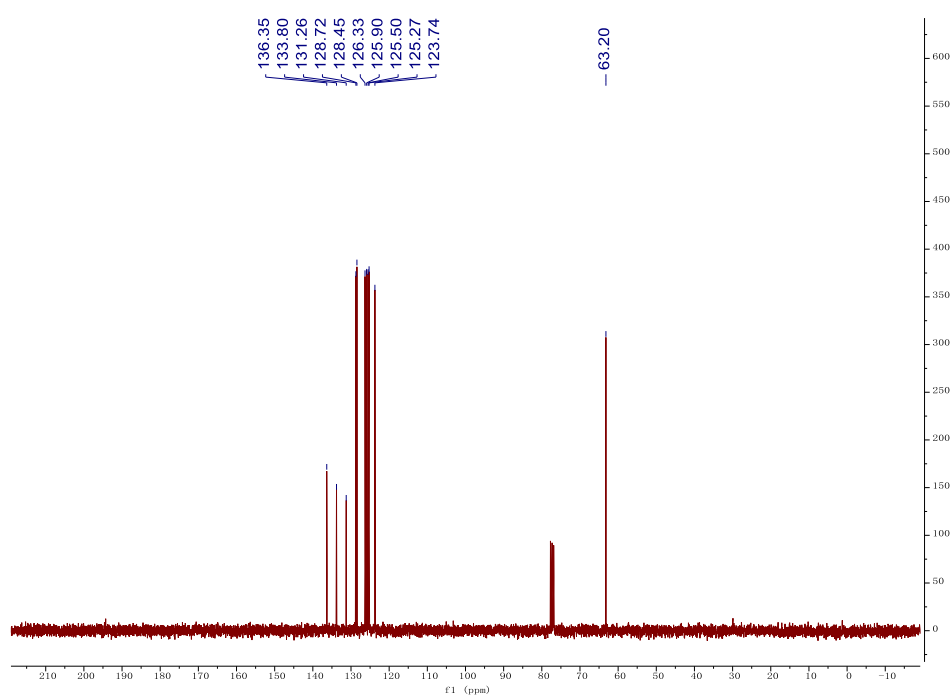

Figure S40.  $^{13}\text{C}$  NMR spectrum of **2o** in  $\text{CDCl}_3$



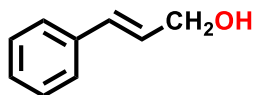

$^1\text{H NMR}$  (300 MHz,  $\text{CDCl}_3$ ,  $\delta$ ): 7.14-7.29 (m, Ar-H, 5H), 6.50 (d, HC=C, 1H), 6.20-6.29 (m, C=CH, 1H), 4.19 (dd,  $\text{CH}_2$ , 2H), 2.31 (s, OH, 1H).  $^{13}\text{C NMR}$  (75 MHz,  $\text{CDCl}_3$ , 298K, ppm): 136.72 (Ar-C), 131.05 (Ar-C), 128.63 (Ar-C), 128.55 (Ar-C), 127.70 (Ar-C), 126.50 (C=C), 63.59 ( $\text{CH}_2$ ).

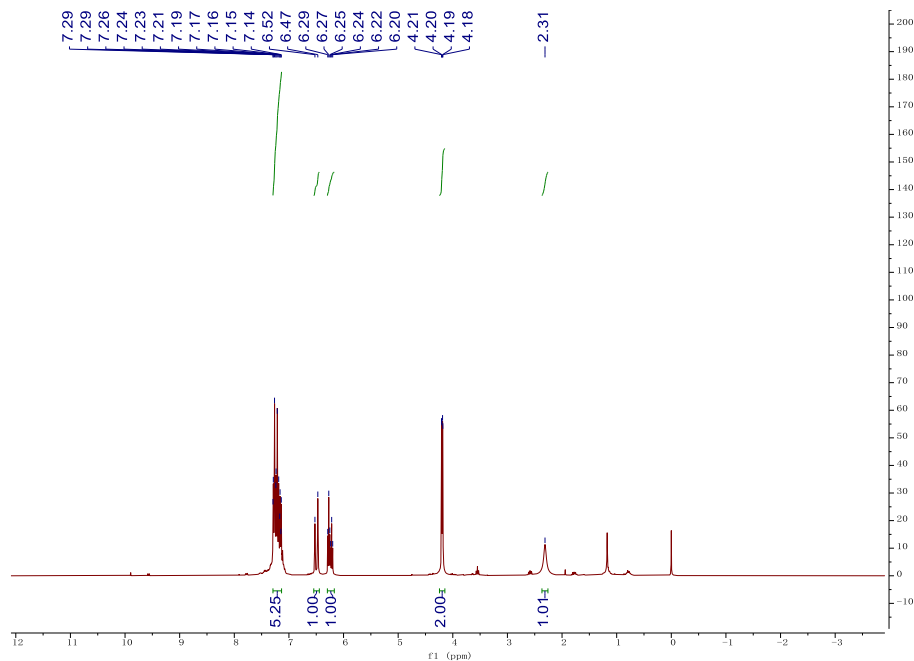

Figure S41.  $^1\text{H NMR}$  spectrum of **2p** in  $\text{CDCl}_3$

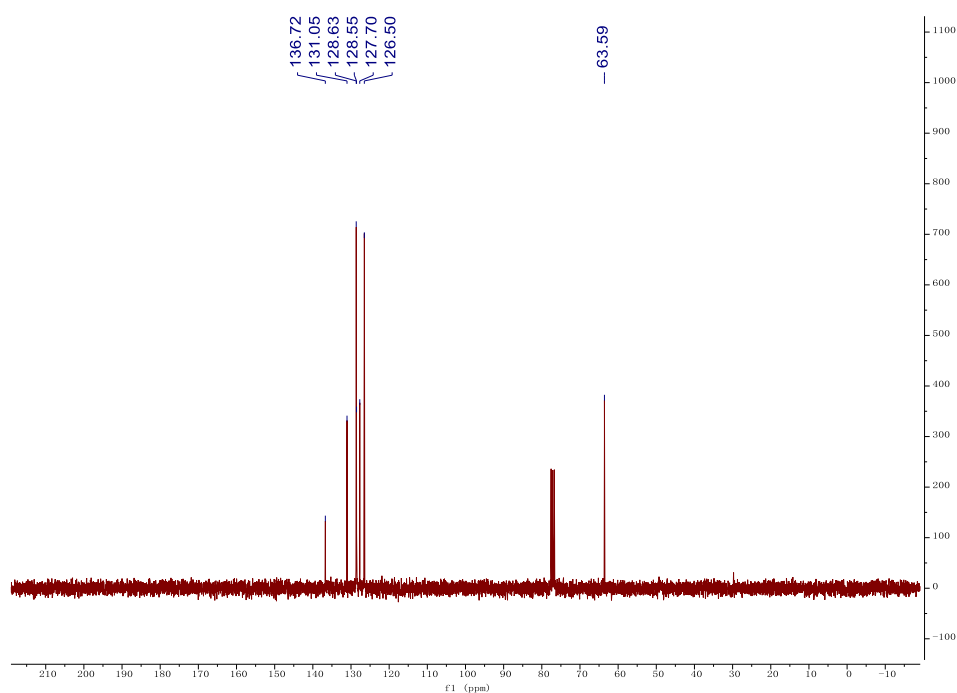

Figure S42.  $^{13}\text{C NMR}$  spectrum of **2p** in  $\text{CDCl}_3$

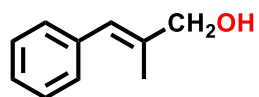

$^1\text{H}$  NMR (300 MHz,  $\text{CDCl}_3$ ,  $\delta$ ): 7.08-7.24 (m, Ar-H, 5H), 6.41 (d, HC=C, 1H), 4.05 (dd,  $\text{CH}_2$ , 2H), 2.73 (s, OH, 1H), 1.77 (d,  $\text{CH}_3$ , 3H).  $^{13}\text{C}$  NMR (75 MHz,  $\text{CDCl}_3$ , 298K, ppm): 137.70 (Ar-C), 137.66 (Ar-C), 128.94 (Ar-C), 128.20 (Ar-C), 126.45 (Ar-C), 124.94 (C=C), 68.77 ( $\text{CH}_2$ ), 15.33 ( $\text{CH}_3$ ).

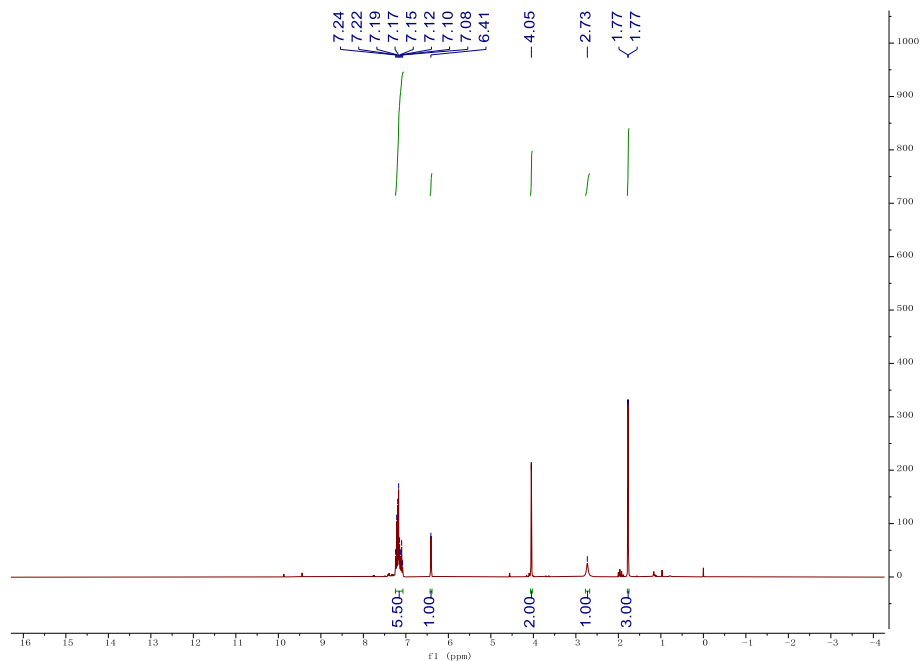

Figure S43.  $^1\text{H}$  NMR spectrum of **2q** in  $\text{CDCl}_3$

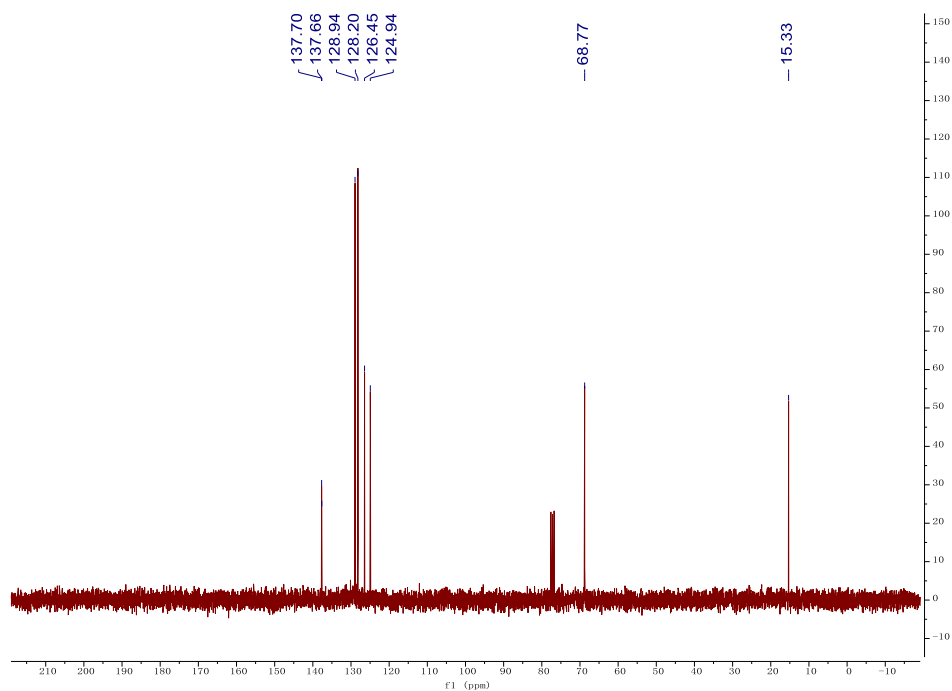

Figure S44.  $^{13}\text{C}$  NMR spectrum of **2q** in  $\text{CDCl}_3$

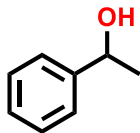

$^1\text{H NMR}$  (300 MHz,  $\text{CDCl}_3$ ,  $\delta$ ): 7.12-7.23 (m, Ar-H, 5H), 4.71 (q, CH, 1H), 2.50 (s, OH, 1H), 1.34 (d,  $\text{CH}_3$ , 3H).  $^{13}\text{C NMR}$  (75 MHz,  $\text{CDCl}_3$ , 298K, ppm): 145.89 (Ar-C), 128.46 (Ar-C), 127.40 (Ar-C), 125.45 (Ar-C), 70.32 (CH), 25.16 ( $\text{CH}_3$ ).

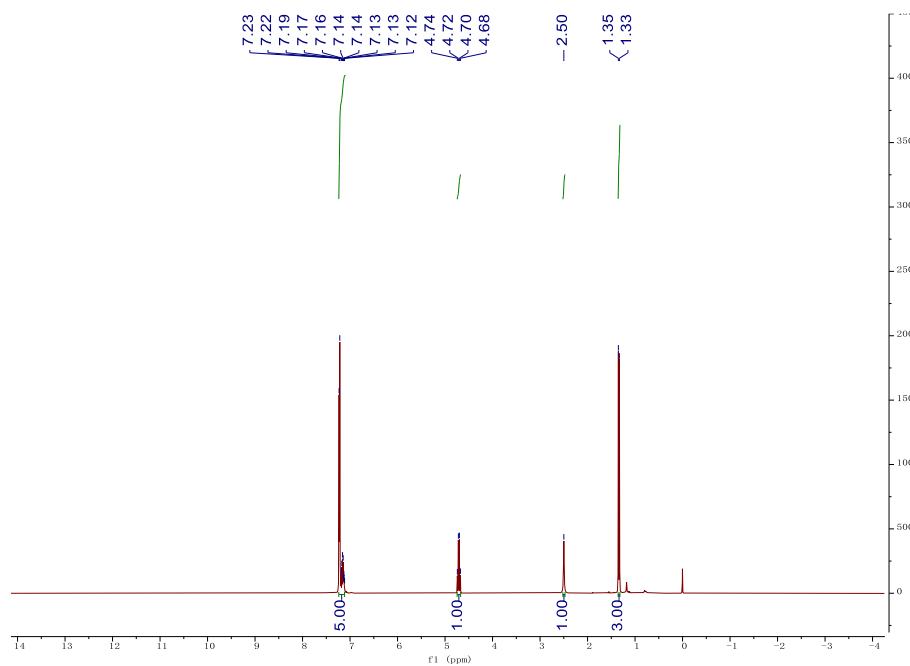

Figure S45.  $^1\text{H NMR}$  spectrum of **1a** in  $\text{CDCl}_3$

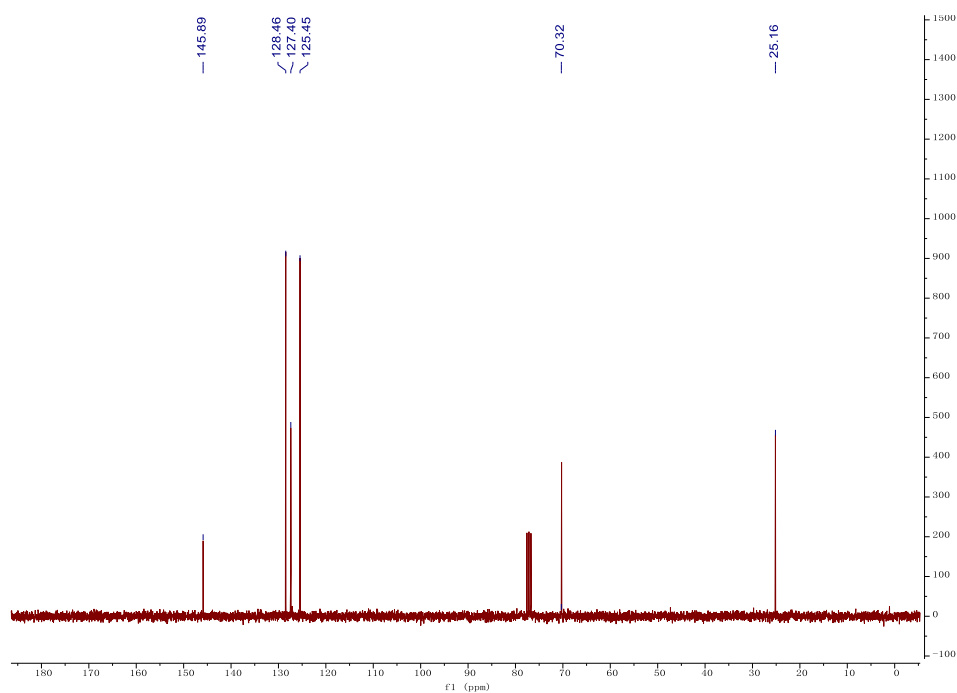

Figure S46.  $^{13}\text{C NMR}$  spectrum of **1a** in  $\text{CDCl}_3$

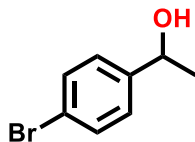

$^1\text{H NMR}$  (300 MHz,  $\text{CDCl}_3$ ,  $\delta$ ): 7.02-7.32 (m, Ar-H, 4H), 4.61 (q, CH, 1H), 3.20 (s, OH, 1H), 1.26 (d,  $\text{CH}_3$ , 3H).  $^{13}\text{C NMR}$  (75 MHz,  $\text{CDCl}_3$ , 298K, ppm): 144.79 (Ar-C), 131.48 (Ar-C), 127.22 (Ar-C), 121.05 (Ar-C), 69.55 (CH), 25.19 ( $\text{CH}_3$ ).

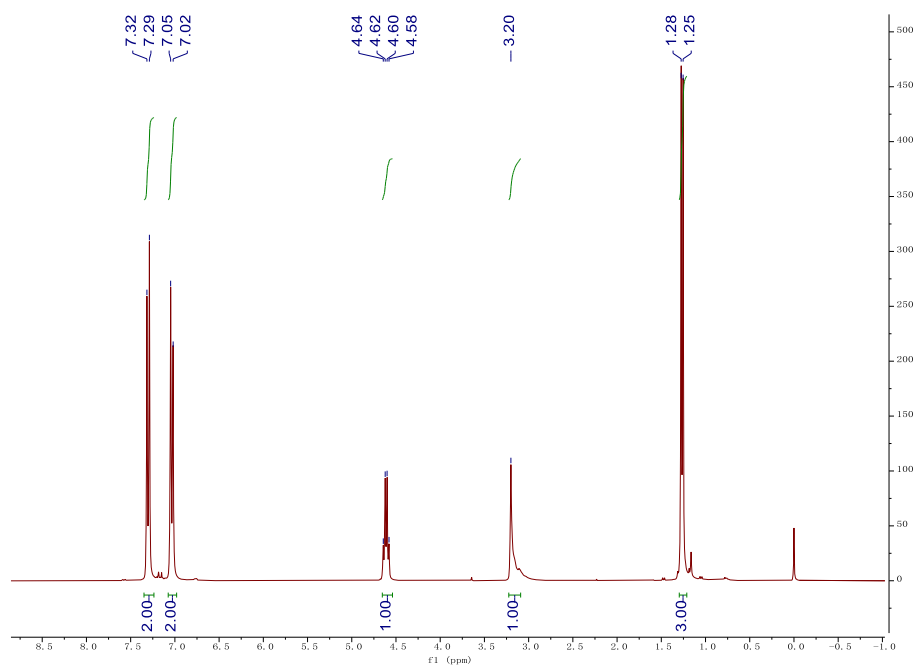

Figure S47.  $^1\text{H NMR}$  spectrum of **1b** in  $\text{CDCl}_3$

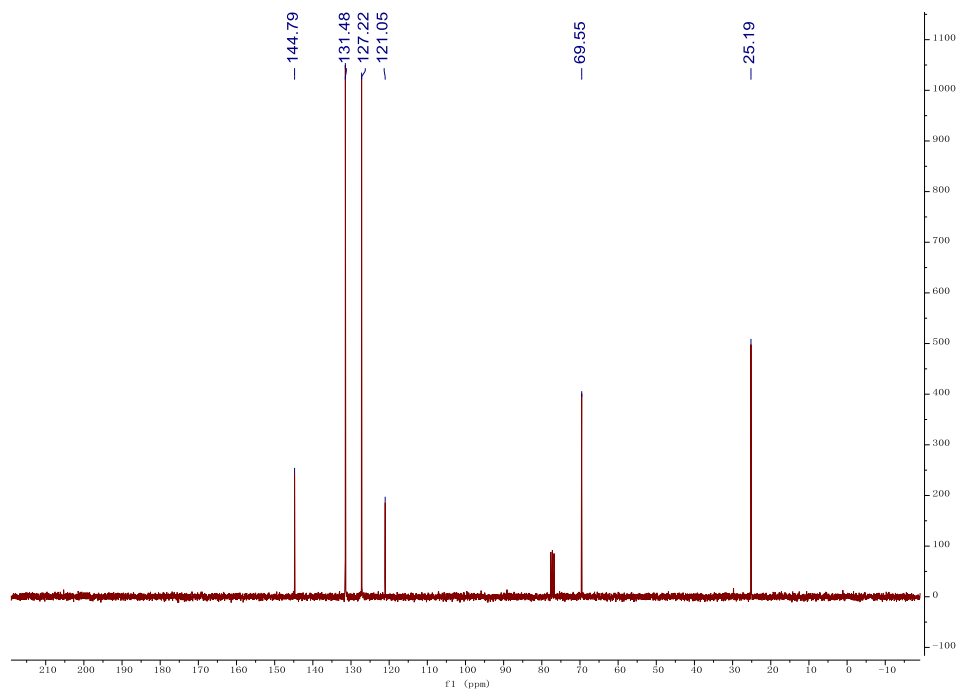

Figure S48.  $^{13}\text{C NMR}$  spectrum of **1b** in  $\text{CDCl}_3$

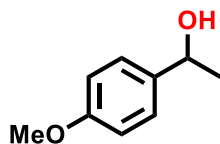

$^1\text{H NMR}$  (300 MHz,  $\text{CDCl}_3$ ,  $\delta$ ): 7.09-7.17 (m, Ar-H, 2H), 6.70-6.79 (m, Ar-H, 2H), 4.68 (q, CH, 1H), 3.66 (s,  $\text{OCH}_3$ , 3H), 2.52 (s, OH, 1H), 1.33 (d,  $\text{CH}_3$ , 3H).  $^{13}\text{C NMR}$  (75 MHz,  $\text{CDCl}_3$ , 298K, ppm): 158.85 (Ar-C), 138.16 (Ar-C), 126.72 (Ar-C), 113.78 (Ar-C), 69.79 (CH), 55.26 ( $\text{OCH}_3$ ), 25.07 ( $\text{CH}_3$ ).

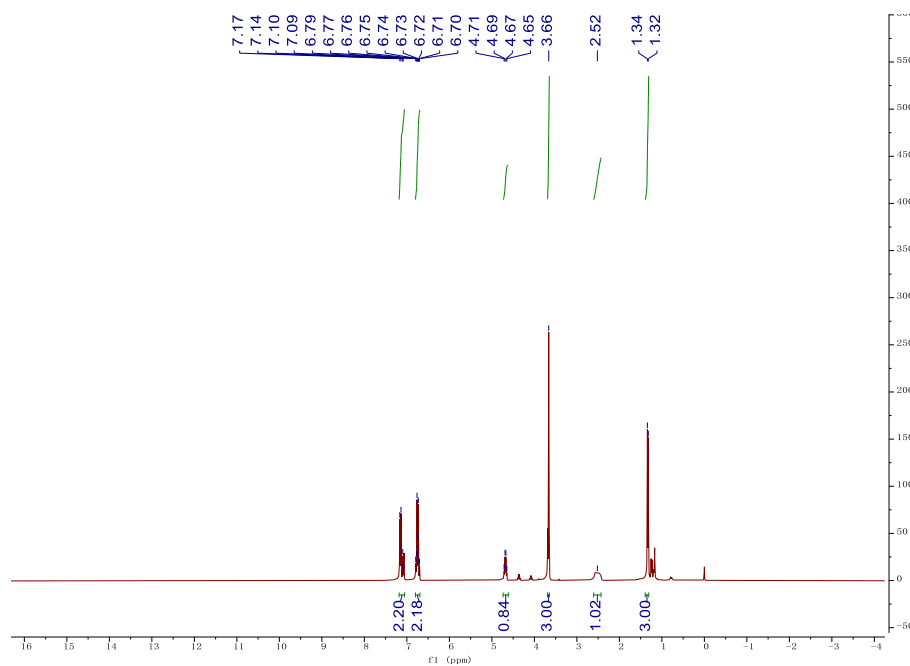

Figure S49.  $^1\text{H NMR}$  spectrum of **1c** in  $\text{CDCl}_3$

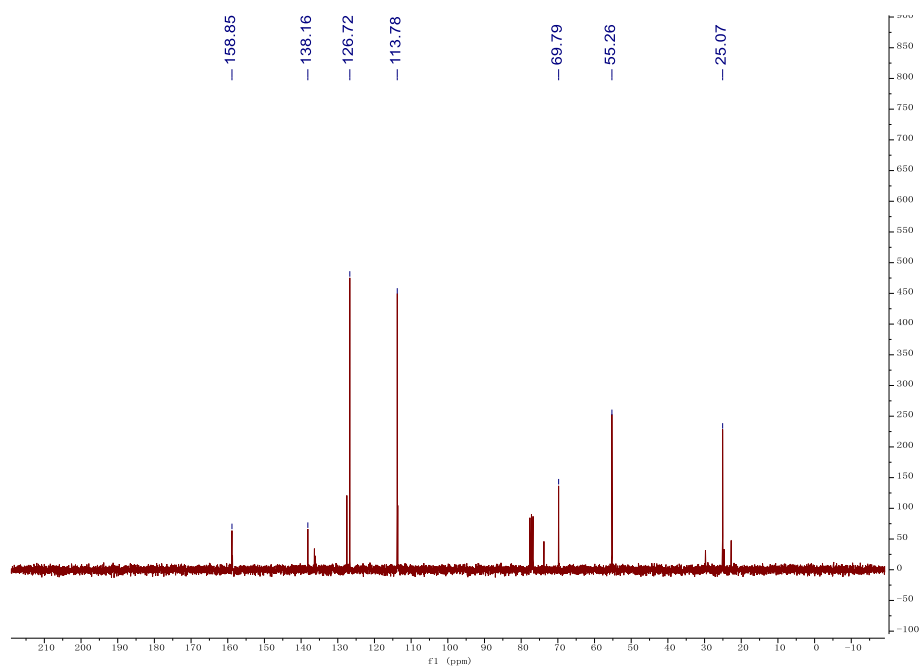

Figure S50.  $^{13}\text{C NMR}$  spectrum of **1c** in  $\text{CDCl}_3$

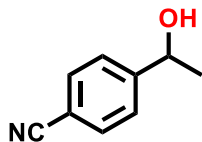

$^1\text{H NMR}$  (300 MHz,  $\text{CDCl}_3$ ,  $\delta$ ): 7.36-7.50 (m, Ar-H, 4H), 4.82 (q, CH, 1H), 3.10 (s, OH, 1H), 1.36 (d,  $\text{CH}_3$ , 3H).  $^{13}\text{C NMR}$  (75 MHz,  $\text{CDCl}_3$ , 298K, ppm): 151.51 (Ar-C), 132.25 (Ar-C), 126.12 (Ar-C), 118.93 (Ar-C), 108.33 (Ar-C), 69.38 (CH), 24.79 ( $\text{CH}_3$ ).

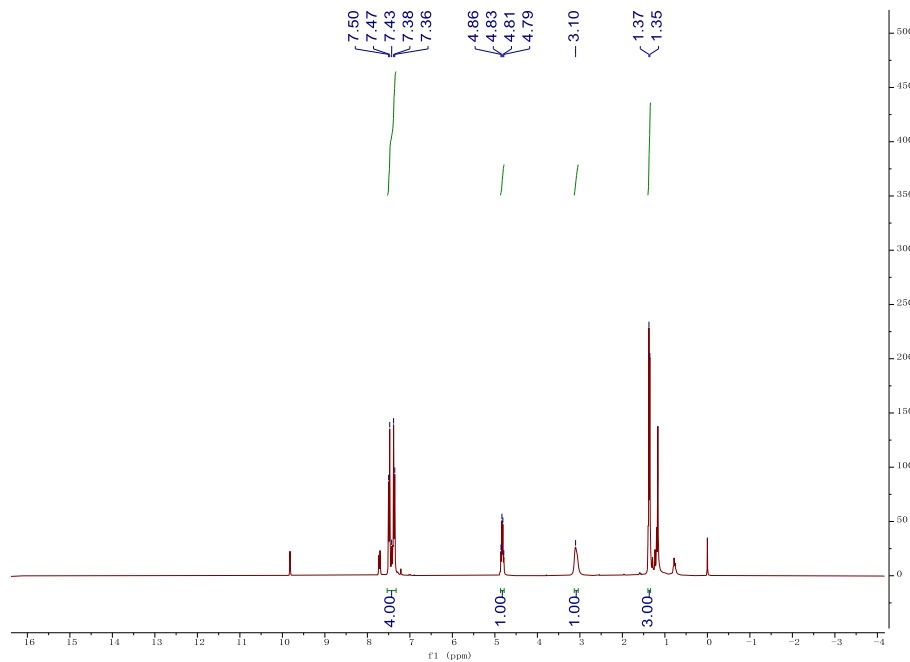

Figure S51.  $^1\text{H NMR}$  spectrum of **1d** in  $\text{CDCl}_3$

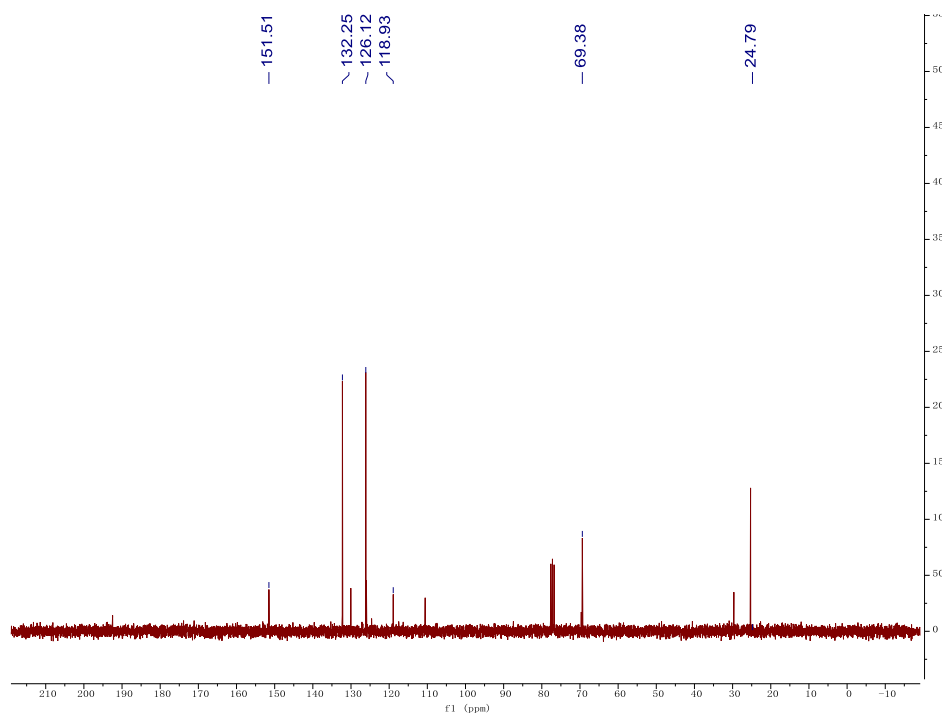

Figure S52.  $^{13}\text{C NMR}$  spectrum of **1d** in  $\text{CDCl}_3$

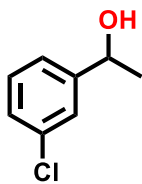

$^1\text{H}$  NMR (300 MHz,  $\text{CDCl}_3$ ,  $\delta$ ): 7.25 (s, Ar-H, 1H), 7.09-7.17 (m, Ar-H, 3H), 4.71 (q, CH, 1H), 2.50 (s, OH, 1H), 1.34 (d,  $\text{CH}_3$ , 3H).  $^{13}\text{C}$  NMR (75 MHz,  $\text{CDCl}_3$ , 298K, ppm): 147.87 (Ar-C), 134.31 (Ar-C), 129.79 (Ar-C), 127.49 (Ar-C), 125.63 (Ar-C), 123.58 (Ar-C), 69.71 (CH), 25.18 ( $\text{CH}_3$ ).

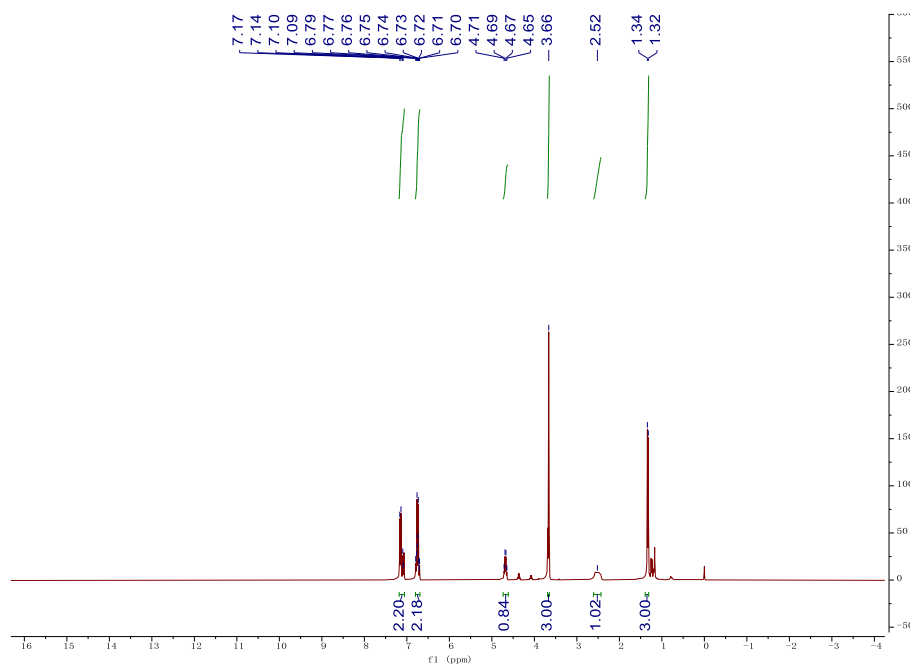

Figure S53.  $^1\text{H}$  NMR spectrum of **1e** in  $\text{CDCl}_3$

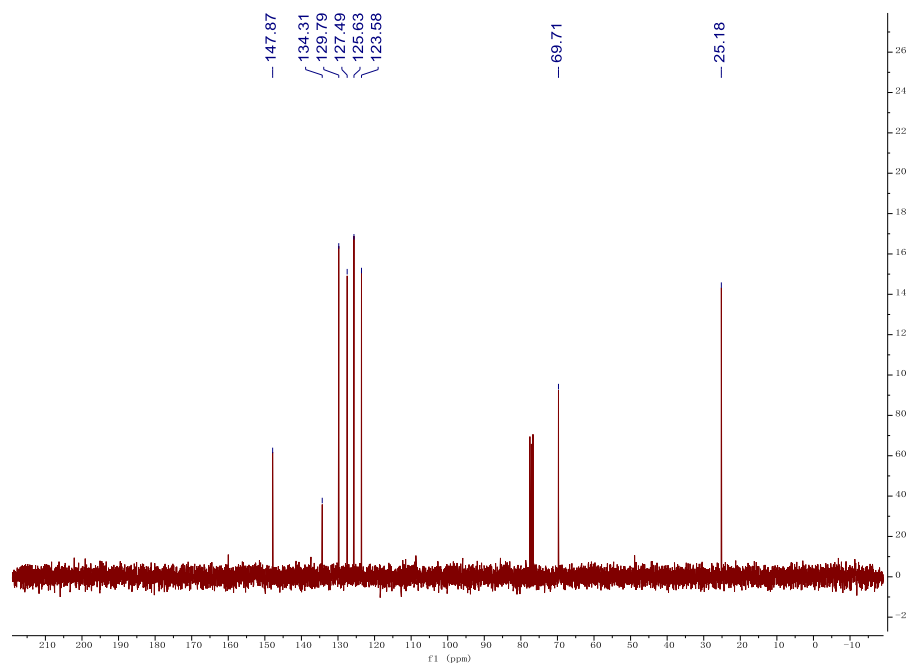

Figure S54.  $^{13}\text{C}$  NMR spectrum of **1e** in  $\text{CDCl}_3$

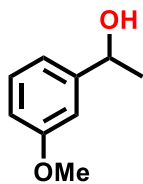

$^1\text{H NMR}$  (300 MHz,  $\text{CDCl}_3$ ,  $\delta$ ): 6.66-7.16 (m, Ar-H, 4H), 4.69 (q, CH, 1H), 3.67 (d,  $\text{OCH}_3$ , 3H), 2.61 (s, OH, 1H), 1.34 (d,  $\text{CH}_3$ , 3H).  $^{13}\text{C NMR}$  (75 MHz,  $\text{CDCl}_3$ , 298K, ppm): 159.68 (Ar-C), 147.73 (Ar-C), 129.49 (Ar-C), 117.76 (Ar-C), 112.79 (Ar-C), 110.93 (Ar-C), 70.16 (CH), 55.19 ( $\text{OCH}_3$ ), 25.16 ( $\text{CH}_3$ ).

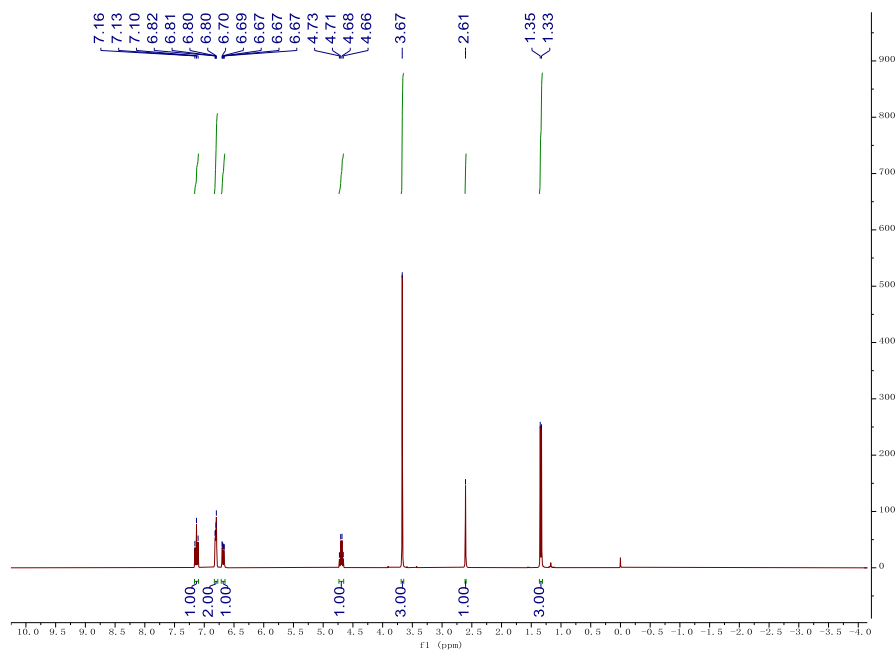

Figure S55.  $^1\text{H NMR}$  spectrum of **1f** in  $\text{CDCl}_3$

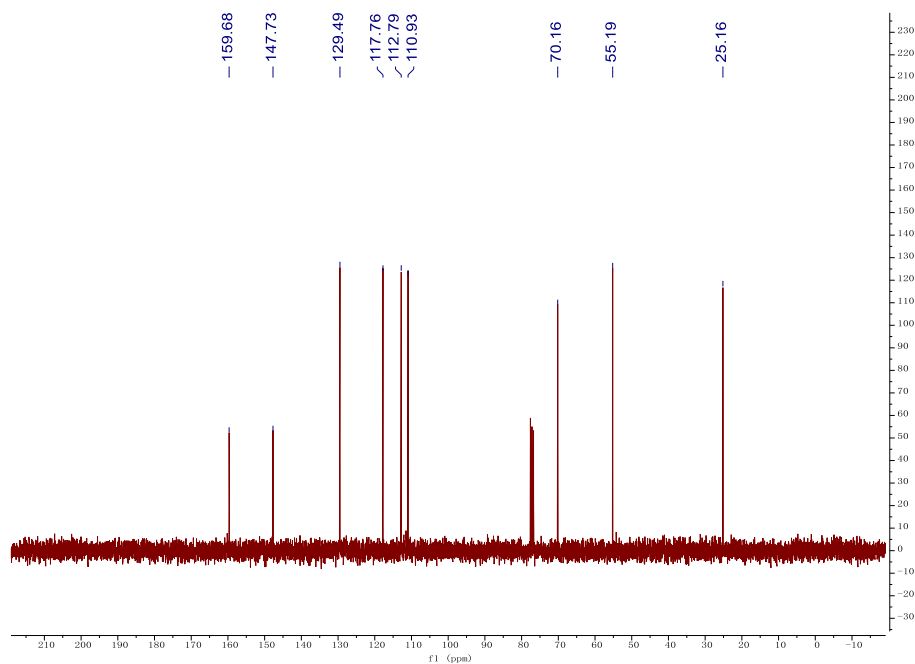

Figure S56.  $^{13}\text{C NMR}$  spectrum of **1f** in  $\text{CDCl}_3$



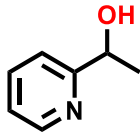

$^1\text{H NMR}$  (300 MHz,  $\text{CDCl}_3$ ,  $\delta$ ): 8.40 (d, Ar-H, 1H), 7.59 (td, Ar-H, 1H), 7.29 (d, Ar-H, 1H), 7.09 (m, Ar-H, 1H), 4.81 (q, CH, 1H), 4.24 (s, OH, 1H), 1.41 (d,  $\text{CH}_3$ , 3H).  $^{13}\text{C NMR}$  (75 MHz,  $\text{CDCl}_3$ , 298K, ppm): 163.46 (Ar-C), 148.05 (Ar-C), 136.90 (Ar-C), 122.19 (Ar-C), 119.80 (Ar-C), 69.13 (CH), 24.15 ( $\text{CH}_3$ ).

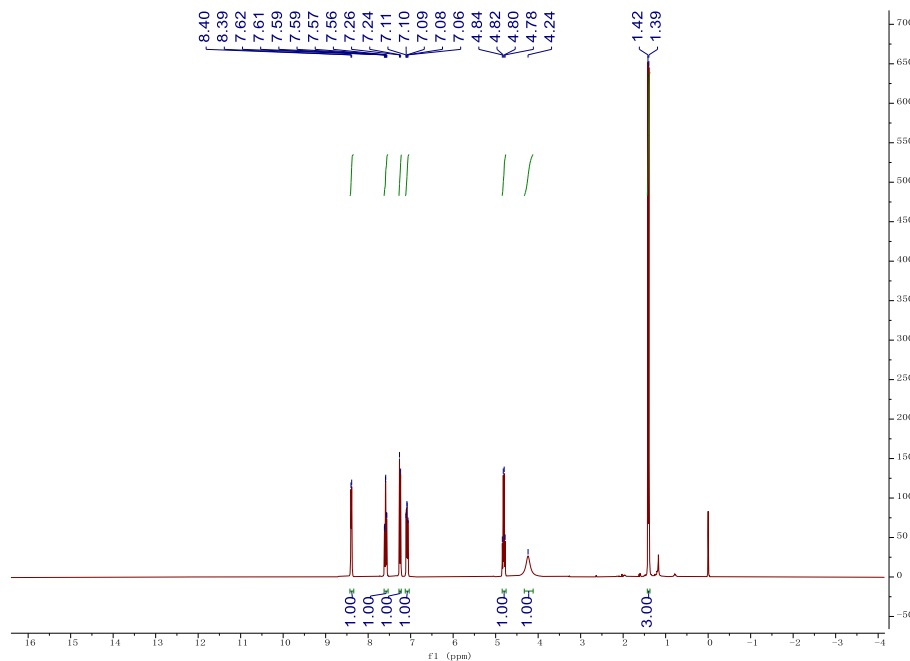

Figure S57.  $^1\text{H NMR}$  spectrum of **1g** in  $\text{CDCl}_3$

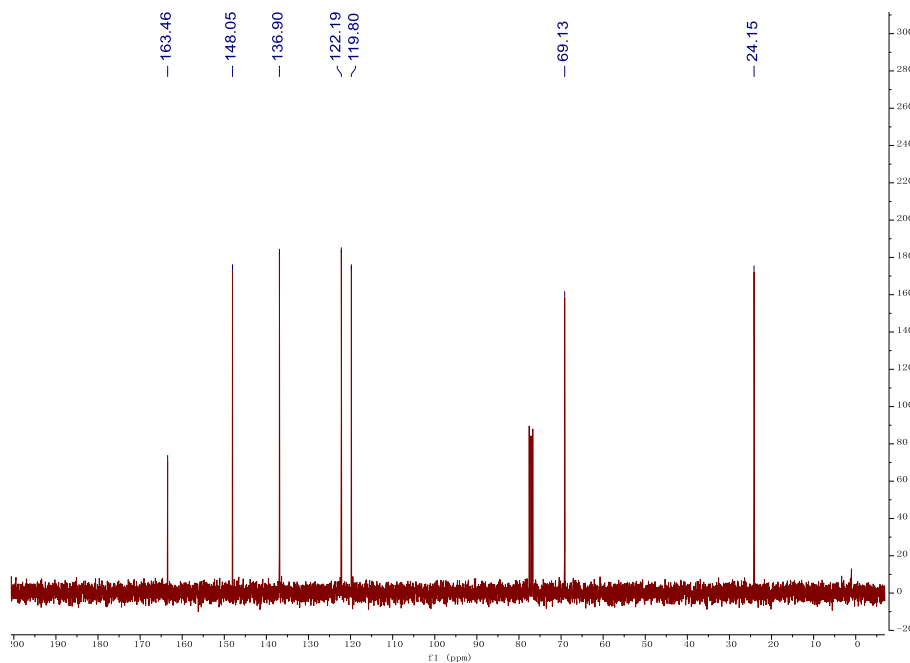

Figure S58.  $^{13}\text{C NMR}$  spectrum of **1g** in  $\text{CDCl}_3$

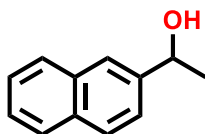

**<sup>1</sup>H NMR** (300 MHz, CDCl<sub>3</sub>, δ): 7.69–7.72 (m, Ar-H, 3H), 7.67 (s, Ar-H, 1H), 7.35–7.38 (m, Ar-H, 3H), 4.91 (q, CH, 1H), 2.12 (s, OH, 1H), 1.45 (d, CH<sub>3</sub>, 3H). **<sup>13</sup>C NMR** (75 MHz, CDCl<sub>3</sub>, 298K, ppm): 143.26 (Ar-C), 133.37 (Ar-C), 132.96 (Ar-C), 128.36 (Ar-C), 128.01 (Ar-C), 127.75 (Ar-C), 126.21 (Ar-C), 125.86 (Ar-C), 123.87 (Ar-C), 70.54 (CH), 25.20 (CH<sub>3</sub>).

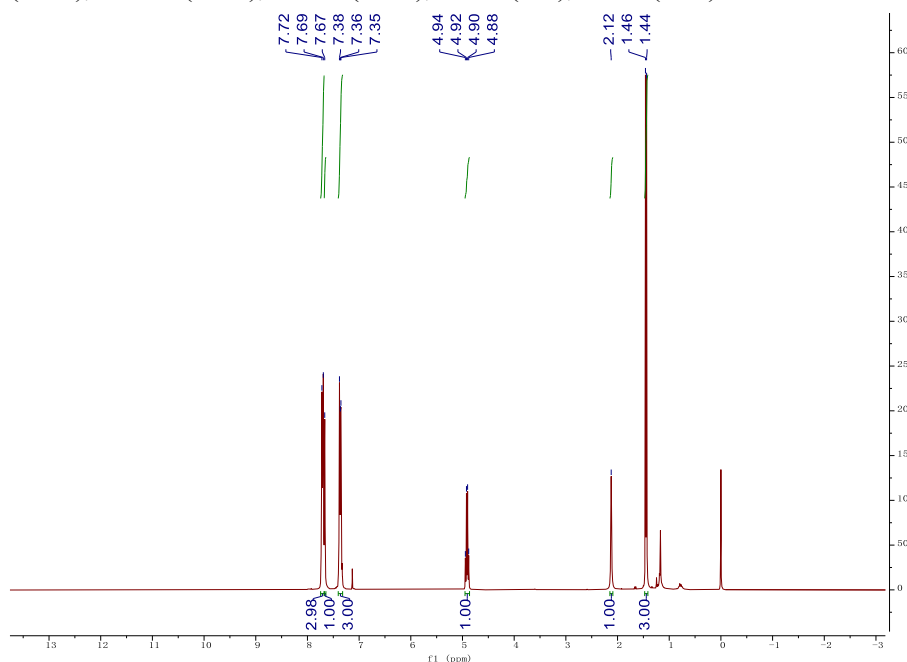

**Figure S59.** <sup>1</sup>H NMR spectrum of **1h** in CDCl<sub>3</sub>

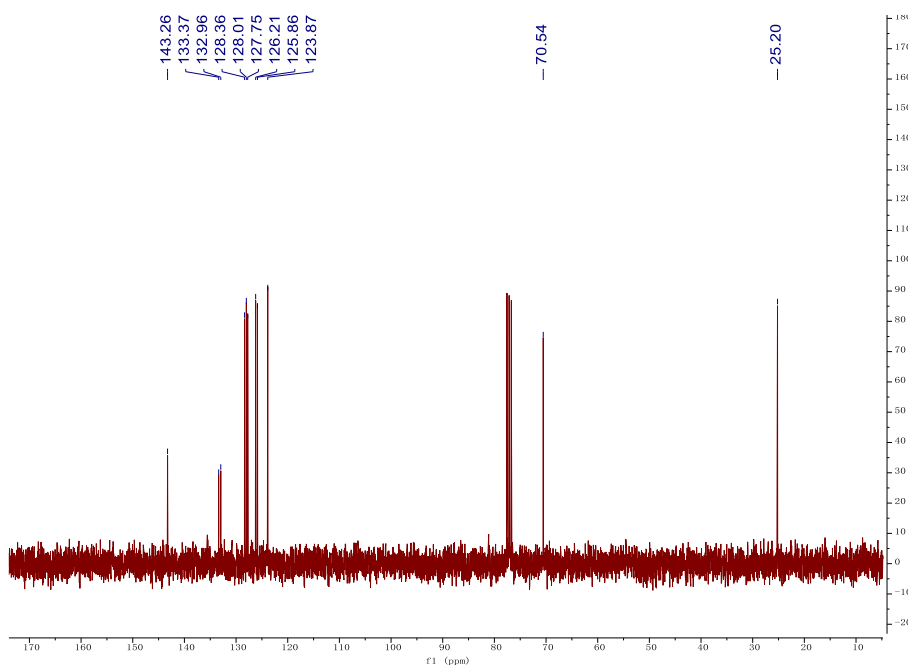

**Figure S60.** <sup>13</sup>C NMR spectrum of **1h** in CDCl<sub>3</sub>

#### 4. Computational Details

All computations were performed using Gaussian16<sup>1</sup> utilizing the PBE1PBE level of theory, Def2SVP basis sets and empirical dispersion correction (GD3). No solvent corrections were applied. All optimized molecular structures were checked to be minima on the energy hypersurface and possess no imaginary vibrational frequencies.

**Table S2. Computed Data for 3 and Isomers of 4**

| Calcd.        | H trans to       | $\Delta G$<br>kJ/mol | unscaled                  |                                       |                                       | obsd.                     |                                       |                                       |
|---------------|------------------|----------------------|---------------------------|---------------------------------------|---------------------------------------|---------------------------|---------------------------------------|---------------------------------------|
|               |                  |                      | <sup>1</sup> H NMR<br>ppm | $\nu(\text{CoH})$<br>cm <sup>-1</sup> | $\nu(\text{SiH})$<br>cm <sup>-1</sup> | <sup>1</sup> H NMR<br>ppm | $\nu(\text{CoH})$<br>cm <sup>-1</sup> | $\nu(\text{SiH})$<br>cm <sup>-1</sup> |
| <b>3</b>      | PMe <sub>3</sub> | —                    | -5.6                      | 2063                                  | 2101, 2137                            | -12.30                    | 1960                                  | 2032, 2052                            |
| <b>4a – A</b> | Cl               | 0.0                  | -26.1                     | 2043                                  | 2163, 2172                            | -28.23                    | 1959                                  | 2086                                  |
| <b>4b – B</b> | Cl               | 17.0                 | -23.6                     | 2043                                  | 2161, 2186                            | -26.75                    |                                       |                                       |
| <b>4c</b>     | SiH <sub>2</sub> | 58.2                 | -4.1                      | 1890                                  | 2062, 2183                            |                           |                                       |                                       |
| <b>4d – E</b> | SiH <sub>2</sub> | 39.5                 | -3.5                      | 1773                                  | 2107, 2177                            | -9.6                      |                                       |                                       |
| <b>4e</b>     | L                | 71.4                 | -9.4                      | 1937                                  | 2077, 2156                            |                           |                                       |                                       |
| <b>4f</b>     | L                | 49.4                 | -6.2                      | 1994                                  | 2092, 2140                            |                           |                                       |                                       |
| <b>4g</b>     | PMe <sub>3</sub> | 47.7                 | -13.5                     | 2017                                  | 2123, 2145                            |                           |                                       |                                       |
| <b>4h</b>     | PMe <sub>3</sub> | 43.2                 | -11.9                     | 1975                                  | 2070, 2146                            |                           |                                       |                                       |

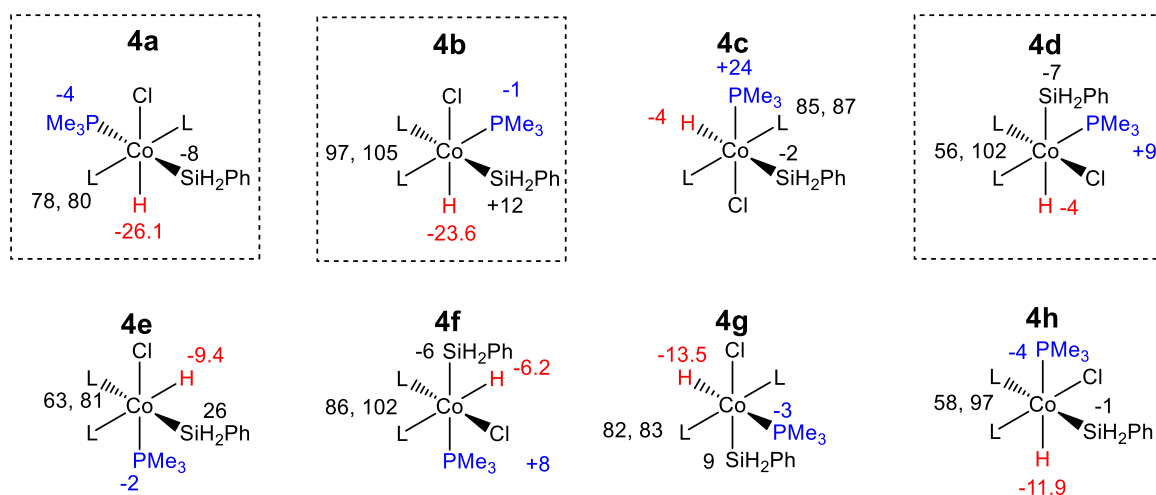

**Scheme S1** Isomers of complex **4**, assigned species highlighted.

**Table S3. Catalysis cycle with 1 and benzaldehyde (S = singlet, T = triplet)**

| Calcd.                                 | G<br>a.u.    | Calcd.                                                        | $\Delta G$<br>a.u. | $\Delta G$<br>kJ/mol |
|----------------------------------------|--------------|---------------------------------------------------------------|--------------------|----------------------|
| PMe <sub>3</sub>                       | -460.540966  | <b>B(S)</b> – [A(S) + PhSiH <sub>3</sub> ]                    | -0.040363          | -106.0               |
| PhSiH <sub>3</sub>                     | -522.198598  | [C(S) + PMe <sub>3</sub> ] – B(S)                             | 0.045509           | 119.5                |
| PhCHO                                  | -344.846491  | <b>D1(S)</b> – [C(S) + PhCHO]                                 | -0.016913          | -44.4                |
| PhCH <sub>2</sub> OSiH <sub>2</sub> Ph | -867.078348  | <b>D2(S)</b> – [C(S) + PhCHO]                                 | -0.011702          | -30.7                |
| <b>A (S)</b>                           | -3223.981976 | <b>E(S)</b> – <b>D1(S)</b>                                    | -0.010490          | -27.5                |
| <b>A (T)</b>                           | -3224.028007 | <b>E(S)</b> – <b>D2(S)</b>                                    | -0.015701          | -41.2                |
| <b>B (S)</b>                           | -3746.220937 | <b>F1(S)</b> – [E(S) + PMe <sub>3</sub> ]                     | -0.010047          | -26.4                |
| <b>C (S)</b>                           | -3285.634462 | <b>F2(S)</b> – E(S)                                           | 0.008366           | 22.0                 |
| <b>D1 (S)</b>                          | -3630.497866 | <b>G(S)</b> – <b>F1(S)</b>                                    | 0.000267           | 0.7                  |
| <b>D2 (S)</b>                          | -3630.492655 | <b>G(S)</b> – [F2(S) + PMe <sub>3</sub> ]                     | 0.018146           | 47.6                 |
| <b>E (S)</b>                           | -3630.492554 | [A(S) + PhCH <sub>2</sub> OSiH <sub>2</sub> Ph] – <b>G(S)</b> | 0.001222           | 3.2                  |
| <b>F1 (S)</b>                          | -4091.059369 | <b>B(S)</b> – [A(T) + PhSiH <sub>3</sub> ]                    | 0.005668           | 14.9                 |
| <b>F2 (S)</b>                          | -3630.499990 | <b>F2(T)</b> – E(S)                                           | -0.034767          | -91.3                |
| <b>F2 (T)</b>                          | -3630.543123 | <b>G(T)</b> – <b>F1(S)</b>                                    | -0.040589          | -106.6               |
| <b>G (S)</b>                           | -4091.059102 | [A(T) + PhCH <sub>2</sub> OSiH <sub>2</sub> Ph] – <b>G(T)</b> | -0.006397          | -16.8                |
| <b>G (T)</b>                           | -4091.099958 | <b>G(T)</b> – [F2(T)+PMe <sub>3</sub> ]                       | -0.015869          | -41.7                |
|                                        |              | <b>A(T)</b> – A(S)                                            | -0.046031          | -120.9               |
|                                        |              | <b>F2(T)</b> – F2(S)                                          | -0.043133          | -113.2               |
|                                        |              | <b>G(T)</b> – G(S)                                            | -0.040856          | -107.3               |

**5. The mechanism study for hydrosilylation of benzaldehyde catalyzed by complex 2**

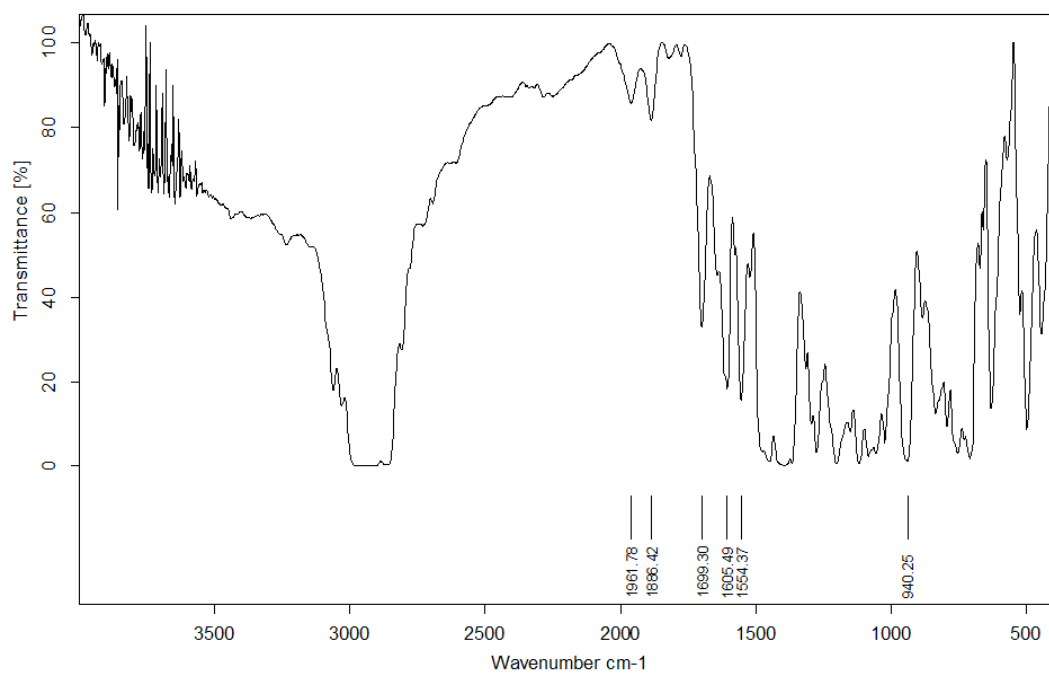

**Figure S61.** IR spectrum of reaction solution of **2** and benzaldehyde at 40°C for 3 min.

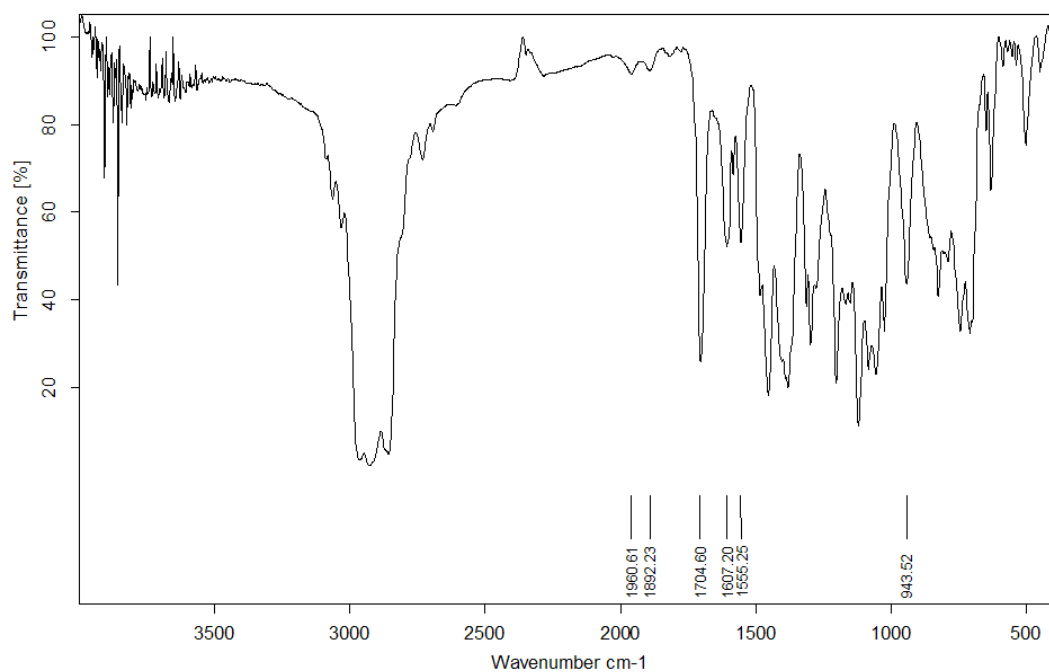

**Figure S62.** IR spectrum of reaction solution of **2** and benzaldehyde at 40°C for 3 min, then addition of benzaldehyde at 40°C for 15 min.

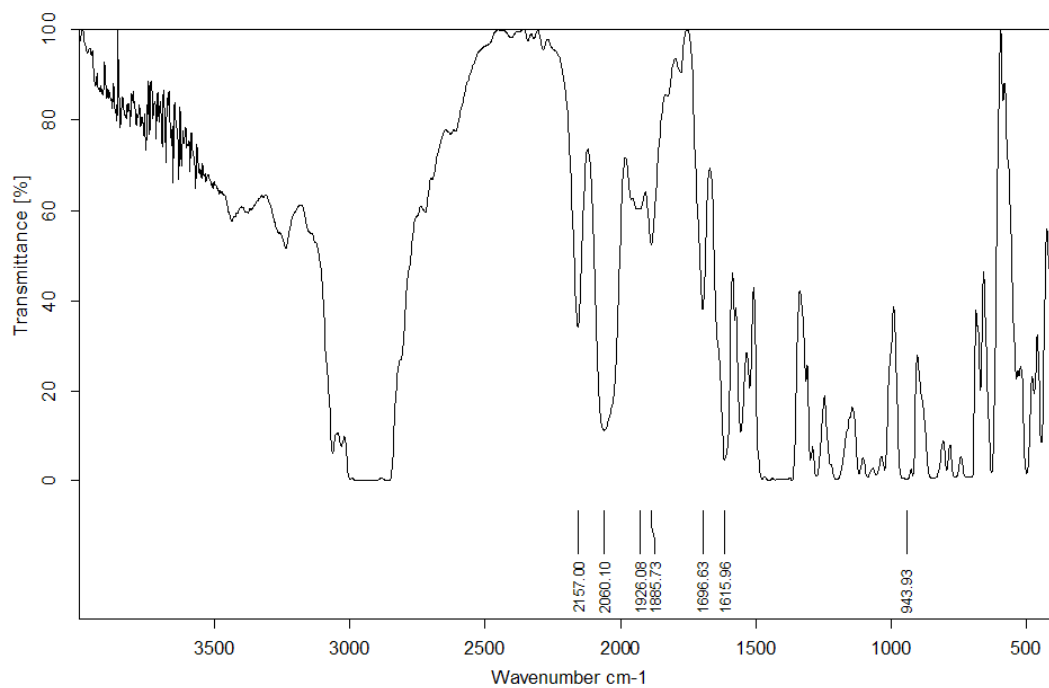

**Figure S63.** IR spectrum of reaction solution of **2** and benzaldehyde at 40°C for 3 min, then addition of benzaldehyde at 40°C for 15 min, then addition of PhSiH<sub>3</sub> at 40°C for 1h.

## 6. References

- 1) M. J. Frisch, G. W. Trucks, H. B. Schlegel, G. E. Scuseria, M. A. Robb, J. R. Cheeseman, G. Scalmani, V. Barone, B. Mennucci, G. A. Petersson, et al., *Gaussian16, Revision B.01*, **2016**.
